# Supplementary material for: A multicomponent bicyclization reaction of isocyanide, allenoate, imine and water to synthesize pyrrolidine-fused rings
Source: Royal Society of Chemistry journal article supplement (doi:10.1039/c7ra05701f), 2017-01-01
Supplement: c7ra05701f1.pdf [file c7ra05701f1.pdf]

# Multicomponent Bicyclization Reaction of Isocyanide, Allenolate, Imine and Water to Synthesize Pyrrolidine-Fused Rings

Hui Jiang,<sup>\*,a,b</sup> Yaming Tian,<sup>c</sup> Lumin Tian<sup>c</sup> and Jian Li<sup>\*,c</sup>

<sup>a</sup> State Key Laboratory of Electronic Thin Films and Integrated Devices, University of Electronic Science and Technology of China, No. 4 Second Section Jianshe North Road, Chengdu 610054, P. R. China

<sup>b</sup> Department of Applied Chemistry, University of Electronic Science and Technology of China Science and Technology of China, No. 4 Second Section Jianshe North Road, Chengdu 610054, P. R. China

<sup>c</sup> Department of Chemistry, Shanghai University, 99 Shangda Road, Shanghai, 200444, P.R. China

E-mail: [jianghui@uestc.edu.cn](mailto:jianghui@uestc.edu.cn); [lijian@shu.edu.cn](mailto:lijian@shu.edu.cn)

## Supporting Information

### Table of Contents

|          |                                                                          |     |
|----------|--------------------------------------------------------------------------|-----|
| <b>1</b> | <b>General Information</b>                                               | S2  |
| <b>2</b> | <b>General Procedure</b>                                                 | S2  |
| <b>3</b> | <b>Characterization Data</b>                                             | S3  |
|          | Spectroscopic Data of All Compounds                                      | S4  |
| <b>4</b> | <b><sup>1</sup>H NMR and <sup>13</sup>C NMR Spectra of All Compounds</b> | S10 |
| <b>5</b> | <b>Crystal Structure of Compound 4a</b>                                  | S38 |

## 1 General Information:

The NMR spectra were recorded on Bruker AC – 500 spectrometer (500 MHz for  $^1\text{H}$  NMR and 125 MHz for  $^{13}\text{C}$  NMR) with  $\text{CDCl}_3$  as the solvent and TMS as internal reference.  $^1\text{H}$  NMR spectral data were reported as follows: chemical shift ( $\delta$ , ppm), multiplicity, integration, and coupling constant (Hz).  $^{13}\text{C}$  NMR spectral data were reported in terms of the chemical shift. The following abbreviations were used to indicate multiplicities: s = singlet; d = doublet; t = triplet; q = quartet; m = multiplet. Low-resolution mass spectra were obtained on a Shimadzu LCMS-2010EV spectrometer in ESI mode and reported as m/z. High-resolution mass spectra (HRMS) were recorded on a Bruker Daltonics, Inc. APEXIII 7.0 TESLA FTMS instrument. Melting points were obtained on a X-4 digital melting point apparatus without correction. Chemical yields referred to pure isolated product. Purification of products was accomplished by column chromatography packed with silica gel. Unless otherwise stated, all reagents were commercially purchased and used without further purification. Aromatic isocyanides **1** were prepared from the corresponding anilines according to the method disclosed by Ugi with a slight modification.<sup>[1]</sup>

## 2 General Procedure

To a solution of isocyanide **1** (0.5 mmol), and substituted allenoate **2** (0.6 mmol) in a mixed solvent (5 mL; toluene/ $\text{H}_2\text{O}$ , v/v = 6:1), imine **3** (0.5 mmol) was added. The reaction mixture was stirred under reflux for several hours and the progress was monitored using TLC detection. After completion of present reaction, the reaction mixture was concentrated under vacuum. The residue was purified by column chromatography on silica gel [silica: 200-300; eluant: petroleum ether/ethyl acetate] to afford the product **4-6**.

### 3 Characterization Data

#### Spectroscopic Data of All Compounds

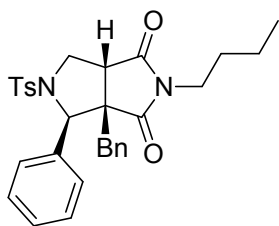

**(4a)**: white solid: m. p. 168-169 °C. <sup>1</sup>H NMR (500 MHz, CDCl<sub>3</sub>): δ (ppm) = 7.43 (d, *J* = 8.0 Hz, 1H), 7.37-7.31 (m, 3H), 7.26 (d, *J* = 2.5 Hz, 1H), 7.15-7.14 (m, 5H), 6.91 (dd, *J* = 8.0, 2.5 Hz, 2H), 5.34 (s, 1H), 4.10-4.06 (m, 1H), 3.97-3.95 (m, 1H), 3.22 (dd, *J* = 9.0, 2.5 Hz, 1H), 2.94-2.91 (m, 2H), 2.71 (dd, *J* = 14.0 Hz, 1H), 2.36 (s, 3H), 2.08 (dd, *J* = 14.0 Hz, 1H), 1.02-0.94 (m, 7H). <sup>13</sup>C NMR (125 MHz, CDCl<sub>3</sub>): δ (ppm) = 179.4, 176.3, 143.5, 137.1, 135.2, 134.8, 129.5, 129.4, 128.8, 127.8, 127.5, 127.1, 69.3, 61.3, 50.1, 48.3, 39.1, 39.0,

29.2, 21.5, 19.8, 13.5. HRMS: Calcd for C<sub>30</sub>H<sub>33</sub>N<sub>2</sub>O<sub>4</sub>S [M+H]<sup>+</sup> 517.2161, Found 517.2158.

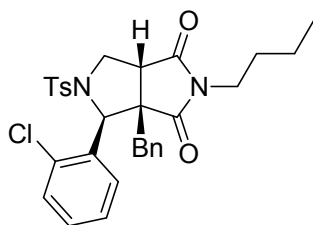

**(4b)**: white solid: m. p. 204-206 °C. <sup>1</sup>H NMR (500 MHz, CDCl<sub>3</sub>): δ (ppm) = 7.58 (dd, *J* = 7.0, 1.5 Hz, 2H), 7.46-7.44 (m, 1H), 7.23-7.22 (m, 5H), 7.46-7.13 (m, 3H), 6.92-6.91 (m, 2H), 5.95 (s, 1H), 4.25-4.20 (m, 1H), 3.96 (dd, *J* = 12.0, 3.0 Hz, 1H), 3.22 (dd, *J* = 9.5, 3.0 Hz, 1H), 2.90 (d, *J* = 13.5 Hz, 1H), 2.79-2.76 (m, 1H), 2.38 (s, 3H), 2.09 (d, *J* = 13.5 Hz, 1H), 0.95-0.74 (m, 7H). <sup>13</sup>C NMR (125 MHz, CDCl<sub>3</sub>): δ (ppm) = 178.3, 175.9, 143.8,

136.3, 134.9, 134.5, 133.7, 130.3, 129.8, 129.6, 128.7, 127.6, 127.4, 127.2, 65.0, 61.9, 51.0, 48.6, 38.9, 38.3, 29.1, 21.5, 19.8, 13.5. HRMS: Calcd for C<sub>30</sub>H<sub>32</sub>ClN<sub>2</sub>O<sub>4</sub>S [M+H]<sup>+</sup> 551.1771, Found 551.1760.

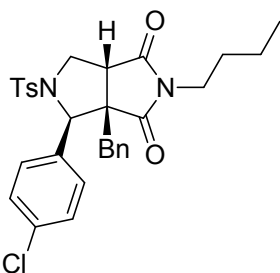

**(4c)**: white solid: m. p. 210-212 °C. <sup>1</sup>H NMR (500 MHz, CDCl<sub>3</sub>): δ (ppm) = 7.45 (d, *J* = 8.5 Hz, 2H), 7.31 (d, *J* = 9.0 Hz, 2H), 7.22-7.15 (m, 7H), 6.91-6.89 (m, 2H), 5.26 (s, 1H), 4.08-4.04 (m, 1H), 3.95 (dd, *J* = 7.0, 3.0 Hz, 1H), 3.22-3.19 (m, 1H), 2.94-2.69 (m, 2H), 2.70 (d, *J* = 14.0 Hz, 1H), 2.38 (s, 3H), 2.06 (d, *J* = 13.5 Hz, 1H), 1.02-0.76 (m, 7H). <sup>13</sup>C NMR (125 MHz, CDCl<sub>3</sub>): δ (ppm) = 179.1, 176.0, 143.8, 135.7, 134.9, 134.5, 134.4, 129.6, 129.5, 129.1,

128.9, 128.8, 127.7, 127.2, 68.7, 61.1, 50.4, 48.1, 39.1, 39.0, 29.2, 21.5, 19.8, 13.5. HRMS: Calcd for C<sub>30</sub>H<sub>32</sub>ClN<sub>2</sub>O<sub>4</sub>S [M+H]<sup>+</sup> 551.1771, Found 551.1768.

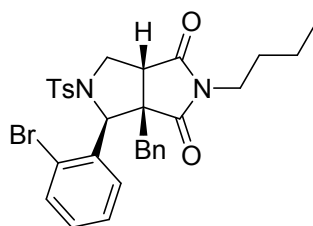

**(4d)**: white solid: m. p. 176-177 °C. <sup>1</sup>H NMR (500 MHz, CDCl<sub>3</sub>): δ (ppm) = 7.63-7.58 (m, 3H), 7.29-7.12 (m, 8H), 6.91 (d, *J* = 3.0 Hz, 2H), 5.96 (s, 1H), 4.27-4.22 (m, 1H), 3.92 (dd, *J* = 12.0, 3.0 Hz, 1H), 3.26 (dd, *J* = 9.5, 3.0 Hz, 1H), 2.88-2.79 (m, 3H), 2.37 (s, 3H), 2.08 (d, *J* = 13.0 Hz, 1H), 0.94-0.73 (m, 7H). <sup>13</sup>C NMR (125 MHz, CDCl<sub>3</sub>): δ (ppm) = 178.2,

175.9, 143.8, 137.9, 134.9, 134.4, 133.6, 129.8, 129.6, 128.7, 128.3, 128.0, 127.6, 127.2, 124.1, 67.3, 62.1, 51.2, 48.6, 38.9, 38.7, 29.1, 21.5, 19.8, 13.5. HRMS: Calcd for C<sub>30</sub>H<sub>32</sub>BrN<sub>2</sub>O<sub>4</sub>S [M+H]<sup>+</sup> 595.1266, Found 595.1268.

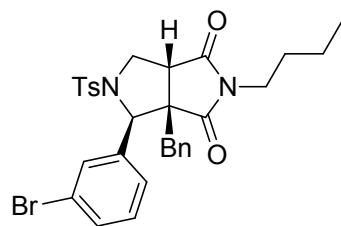

**(4e)**: white solid: m. p. 171-172 °C.  $^1\text{H}$  NMR (500 MHz,  $\text{CDCl}_3$ ):  $\delta$  (ppm) = 7.44-7.42 (m, 3H), 7.28-7.14 (m, 8H), 6.93-6.91 (m, 2H), 5.27 (s, 1H), 4.08-4.03 (m, 1H), 4.00 (dd,  $J$  = 12.0, 2.5 Hz, 1H), 3.22 (dd,  $J$  = 9.0, 2.5 Hz, 1H), 2.95-2.91 (m, 1H), 2.71 (d,  $J$  = 13.5 Hz, 1H), 2.38 (s, 3H), 2.05 (d,  $J$  = 14.0 Hz, 1H), 1.02-0.76 (m, 7H).  $^{13}\text{C}$  NMR (125 MHz,  $\text{CDCl}_3$ ):  $\delta$  (ppm) = 179.1, 176.0, 143.9, 139.3, 134.5, 131.5, 130.5, 130.3, 129.7, 129.5, 128.8, 127.7, 127.1, 126.7, 123.0, 68.7, 61.2, 50.6, 48.1, 39.1, 30.9, 29.2, 21.5, 19.8, 13.5. HRMS: Calcd for  $\text{C}_{30}\text{H}_{32}\text{BrN}_2\text{O}_4\text{S}$   $[\text{M}+\text{H}]^+$  595.1266, Found 595.1268.

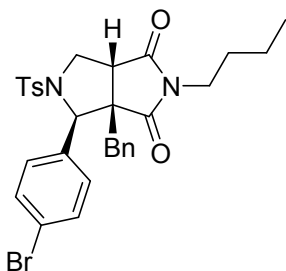

**(4f)**: white solid: m. p. 145-147 °C.  $^1\text{H}$  NMR (500 MHz,  $\text{CDCl}_3$ ):  $\delta$  (ppm) = 7.47-7.43 (m, 4H), 7.18-7.14 (m, 7H), 6.91-6.89 (m, 2H), 5.24 (s, 1H), 4.07-4.03 (m, 1H), 3.95 (dd,  $J$  = 7.0, 3.0 Hz, 1H), 3.20 (dd,  $J$  = 8.5, 3.0 Hz, 6H), 2.94-2.90 (m, 2H), 2.70 (d,  $J$  = 13.5 Hz, 1H), 2.05 (s, 3H), 2.07 (d,  $J$  = 13.5 Hz, 1H), 1.02-0.76 (m, 7H).  $^{13}\text{C}$  NMR (125 MHz,  $\text{CDCl}_3$ ):  $\delta$  (ppm) = 179.1, 176.0, 143.8, 136.2, 134.9, 134.5, 131.9, 129.6, 129.5, 128.8, 127.6, 127.2, 122.5, 68.7, 61.1, 50.5, 48.1, 39.1, 39.0, 29.2, 21.5, 19.8, 13.5. HRMS: Calcd for  $\text{C}_{30}\text{H}_{32}\text{BrN}_2\text{O}_4\text{S}$   $[\text{M}+\text{H}]^+$  595.1266, Found 595.1261.

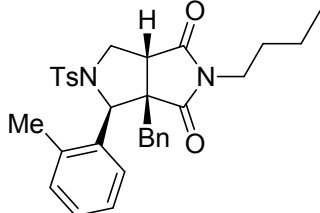

**(4g)**: white solid: m. p. 183-184 °C.  $^1\text{H}$  NMR (500 MHz,  $\text{CDCl}_3$ ):  $\delta$  (ppm) = 7.43 (d,  $J$  = 8.5 Hz, 2H), 7.23-7.12 (m, 7H), 7.07 (t,  $J$  = 7.0 Hz, 1H), 6.99 (d,  $J$  = 7.5 Hz, 1H), 6.92-6.90 (m, 2H), 5.71 (s, 1H), 4.16-4.12 (m, 1H), 4.03 (dd,  $J$  = 12.0, 3.0 Hz, 1H), 3.26 (dd,  $J$  = 9.0, 2.5 Hz, 1H), 2.91 (t,  $J$  = 7.5 Hz, 1H), 2.65 (s, 3H), 2.56 (d,  $J$  = 13.5 Hz, 1H), 2.36 (s, 3H), 2.14 (d,  $J$  = 13.5 Hz, 1H), 1.01-0.76 (m, 7H).  $^{13}\text{C}$  NMR (125 MHz,  $\text{CDCl}_3$ ):  $\delta$  (ppm) = 179.7, 176.4, 143.5, 136.6, 136.2, 135.4, 134.7, 131.1, 129.6, 129.5, 128.7, 128.1, 127.5, 127.1, 126.6, 126.4, 64.9, 61.7, 50.8, 48.9, 39.0, 38.8, 29.2, 21.4, 19.9, 19.8, 13.5. HRMS: Calcd for  $\text{C}_{31}\text{H}_{35}\text{N}_2\text{O}_4\text{S}$   $[\text{M}+\text{H}]^+$  531.2318, Found 531.2315.

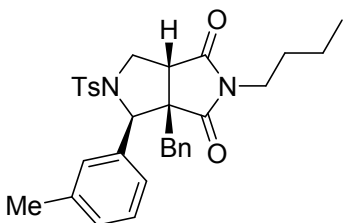

**(4h)**: white solid: m. p. 170-172 °C.  $^1\text{H}$  NMR (500 MHz,  $\text{CDCl}_3$ ):  $\delta$  (ppm) = 7.42-7.39 (m, 2H), 7.20 (t,  $J$  = 7.5 Hz, 1H), 7.15-7.11 (m, 5H), 7.09-6.91 (m, 5H), 5.31 (s, 1H), 4.09-4.05 (m, 1H), 3.96 (dd,  $J$  = 7.0, 2.5 Hz, 1H), 3.23 (dd,  $J$  = 9.0, 2.5 Hz, 1H), 2.95-2.92 (m, 2H), 2.73 (s, 3H), 2.71 (d,  $J$  = 13.5 Hz, 1H), 2.31 (s, 3H), 2.09 (d,  $J$  = 13.5 Hz, 1H), 1.00-0.76 (m, 7H).  $^{13}\text{C}$  NMR (125 MHz,  $\text{CDCl}_3$ ):  $\delta$  (ppm) = 179.5, 176.4, 143.4, 138.5, 136.9, 135.3, 134.9, 129.5, 129.4, 129.1, 128.7, 128.6, 127.5, 127.1, 69.3, 61.3, 50.6, 48.3, 39.1, 39.0, 29.2, 21.5, 21.4, 19.2, 13.5. HRMS: Calcd for  $\text{C}_{31}\text{H}_{35}\text{N}_2\text{O}_4\text{S}$   $[\text{M}+\text{H}]^+$  531.2318, Found 531.2316.

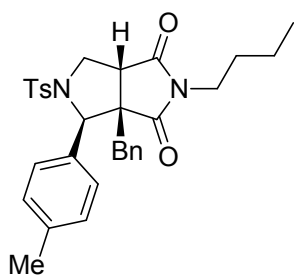

**(4i)**: white solid: m. p. 185-187 °C. <sup>1</sup>H NMR (500 MHz, CDCl<sub>3</sub>): δ (ppm) = 7.41 (d, *J* = 8.5 Hz, 2H), 7.14-7.11 (m, 9H), 6.92-6.90 (m, 2H), 5.29 (s, 1H), 4.09-4.05 (m, 1H), 3.93 (dd, *J* = 12.0, 2.5 Hz, 1H), 3.22 (dd, *J* = 9.0, 2.5 Hz, 1H), 2.94-2.90 (m, 2H), 2.71 (d, *J* = 13.5 Hz, 1H), 2.36 (s, 3H), 2.34 (s, 3H), 2.12 (d, *J* = 13.5 Hz, 1H), 1.01-0.76 (m, 7H). <sup>13</sup>C NMR (125 MHz, CDCl<sub>3</sub>): δ (ppm) = 179.5, 176.4, 143.4, 138.2, 135.3, 134.9, 134.0, 129.5, 129.44, 129.41, 128.7, 127.8, 127.5, 127.2, 69.1, 61.3, 50.5, 48.2, 39.1, 38.9, 29.2, 21.5, 21.1, 19.8, 13.5. HRMS: Calcd for C<sub>31</sub>H<sub>35</sub>N<sub>2</sub>O<sub>4</sub>S [M+H]<sup>+</sup> 531.2318, Found 531.2311.

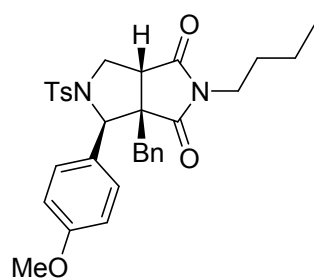

**(4j)**: white solid: m. p. 167-169 °C. <sup>1</sup>H NMR (500 MHz, CDCl<sub>3</sub>): δ (ppm) = 7.41 (d, *J* = 8.5 Hz, 2H), 7.16-7.12 (m, 7H), 6.92-6.90 (m, 2H), 6.83 (d, *J* = 8.5 Hz, 2H), 5.28 (s, 1H), 4.06-4.02 (m, 1H), 3.92 (dd, *J* = 12.0, 2.5 Hz, 1H), 3.80 (s, 3H), 3.22 (dd, *J* = 9.0, 2.5 Hz, 1H), 2.95-2.92 (m, 2H), 2.69 (d, *J* = 14.0 Hz, 1H), 2.35 (s, 3H), 2.14 (d, *J* = 14.0 Hz, 1H), 1.03-0.79 (m, 7H). <sup>13</sup>C NMR (125 MHz, CDCl<sub>3</sub>): δ (ppm) = 179.5, 176.4, 159.6, 143.4, 135.2, 134.9, 129.5, 129.4, 129.1, 129.0, 128.7, 127.5, 127.2, 114.1, 68.9, 61.4, 55.3, 50.4, 48.1, 39.1, 38.9, 29.2, 21.5, 19.8, 13.5. HRMS: Calcd for C<sub>31</sub>H<sub>35</sub>N<sub>2</sub>O<sub>5</sub>S [M+H]<sup>+</sup> 547.2267, Found 547.2265.

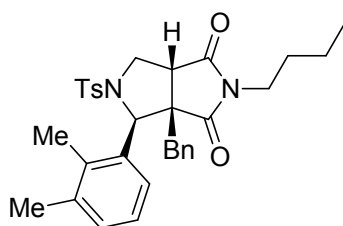

**(4k)**: white solid: m. p. 195-196 °C. <sup>1</sup>H NMR (500 MHz, CDCl<sub>3</sub>): δ (ppm) = 7.47 (d, *J* = 8.5 Hz, 2H), 7.17 (d, *J* = 8.0 Hz, 2H), 7.14-7.09 (m, 4H), 7.03-6.99 (m, 1H), 6.91-6.89 (m, 3H), 5.80 (s, 1H), 4.18-4.13 (m, 1H), 4.02 (dd, *J* = 12.0, 2.5 Hz, 1H), 3.23 (dd, *J* = 9.0, 2.5 Hz, 1H), 2.89-2.86 (m, 2H), 2.60 (d, *J* = 13.5 Hz, 1H), 2.54 (s, 3H), 2.37 (s, 3H), 2.35 (s, 3H), 2.12 (d, *J* = 13.5 Hz, 1H), 1.02-0.76 (m, 3H). <sup>13</sup>C NMR (125 MHz, CDCl<sub>3</sub>): δ (ppm) = 179.8, 176.4, 143.5, 137.6, 136.2, 135.5, 135.0, 134.8, 129.7, 129.6, 129.5, 128.7, 127.5, 127.1, 125.8, 124.2, 65.3, 61.7, 50.8, 48.9, 39.0, 38.8, 29.2, 21.5, 21.1, 19.8, 15.4, 13.5. HRMS: Calcd for C<sub>32</sub>H<sub>37</sub>N<sub>2</sub>O<sub>4</sub>S [M+H]<sup>+</sup> 545.2474, Found 545.2473.

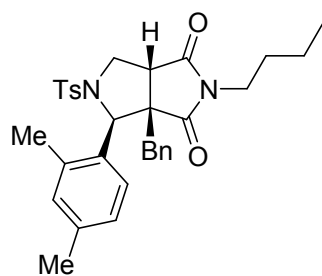

**(4l)**: white solid: m. p. 206-207 °C. <sup>1</sup>H NMR (500 MHz, CDCl<sub>3</sub>): δ (ppm) = 7.45 (d, *J* = 8.5 Hz, 2H), 7.17-7.15 (m, 5H), 7.05 (s, 1H), 6.94-6.93 (m, 2H), 6.89 (s, 2H), 5.68 (s, 1H), 4.17-4.13 (m, 1H), 4.03 (dd, *J* = 12.0, 2.5 Hz, 1H), 3.27 (dd, *J* = 9.0, 2.5 Hz, 1H), 2.95-2.92 (m, 2H), 2.62 (s, 3H), 2.58 (d, *J* = 13.5 Hz, 1H), 2.38 (s, 3H), 2.32 (s, 3H), 2.20 (d, *J* = 13.5 Hz, 1H), 1.05-0.95 (m, 7H). <sup>13</sup>C NMR (125 MHz, CDCl<sub>3</sub>): δ (ppm) = 179.8, 176.4, 143.4, 137.8, 136.4, 135.5, 134.8, 133.1, 131.8, 129.6, 129.5, 128.7, 127.5, 127.1, 127.0, 126.5, 64.7, 61.6, 50.8, 48.8, 39.0, 38.9, 29.2, 21.4, 21.0, 19.9, 19.8, 13.5. HRMS: Calcd for C<sub>32</sub>H<sub>37</sub>N<sub>2</sub>O<sub>4</sub>S [M+H]<sup>+</sup> 545.2474, Found 545.2469.

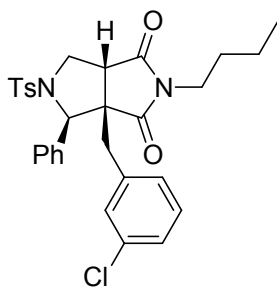

**(5a)**: white solid: m. p. 201-203 °C.  $^1\text{H}$  NMR (500 MHz,  $\text{CDCl}_3$ ):  $\delta$  (ppm) = 7.43 (d,  $J$  = 8.5 Hz, 2H), 7.34-7.32 (m, 3H), 7.26-7.24 (m, 2H), 7.16-7.08 (m, 4H), 6.92-6.91 (m, 1H), 6.80 (d,  $J$  = 7.5 Hz, 1H), 5.32 (s, 1H), 4.10-4.06 (m, 1H), 4.00 (dd,  $J$  = 12.0, 2.5 Hz, 1H), 3.17 (dd,  $J$  = 9.0, 2.5 Hz, 1H), 2.98-2.94 (m, 2H), 2.70 (d,  $J$  = 13.5 Hz, 1H), 2.37 (s, 3H), 2.05 (d,  $J$  = 13.5 Hz, 1H), 1.02-0.79 (m, 7H).  $^{13}\text{C}$  NMR (125 MHz,  $\text{CDCl}_3$ ):  $\delta$  (ppm) = 179.2, 176.0, 143.6, 136.9, 135.2, 134.6, 129.9, 129.7, 128.9, 128.5, 127.8, 127.7, 127.6, 127.1, 69.3, 61.0, 50.6, 48.2, 39.2, 38.7, 29.3, 21.5, 19.8, 13.5. HRMS: Calcd for  $\text{C}_{30}\text{H}_{32}\text{ClN}_2\text{O}_4\text{S}$   $[\text{M}+\text{H}]^+$  551.1771, Found 551.1766.

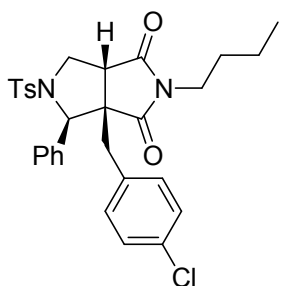

**(5b)**: white solid: m. p. 141-142 °C.  $^1\text{H}$  NMR (500 MHz,  $\text{CDCl}_3$ ):  $\delta$  (ppm) = 7.41 (d,  $J$  = 8.0 Hz, 2H), 7.33-7.31 (m, 3H), 7.25-7.23 (m, 2H), 7.15-7.12 (m, 4H), 6.87-6.85 (m, 2H), 5.32 (s, 1H), 4.09-4.06 (m, 1H), 3.97 (dd,  $J$  = 12.0, 2.5 Hz, 1H), 3.18 (dd,  $J$  = 9.0, 2.5 Hz, 1H), 2.97-2.93 (m, 2H), 2.67 (d,  $J$  = 14.0 Hz, 1H), 2.36 (s, 3H), 2.07 (d,  $J$  = 13.5 Hz, 1H), 1.02-0.92 (m, 7H).  $^{13}\text{C}$  NMR (125 MHz,  $\text{CDCl}_3$ ):  $\delta$  (ppm) = 179.3, 176.5, 143.7, 136.3, 135.4, 133.7, 130.8, 129.5, 128.9, 128.8, 127.8, 127.1, 69.2, 61.1, 50.6, 48.3, 39.1, 38.4, 29.3, 21.5, 19.8, 13.5. HRMS: Calcd for  $\text{C}_{30}\text{H}_{32}\text{ClN}_2\text{O}_4\text{S}$   $[\text{M}+\text{H}]^+$  551.1771, Found 551.1764.

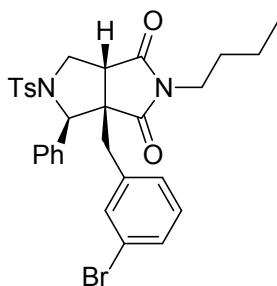

**(5c)**: white solid: m. p. 198-199 °C.  $^1\text{H}$  NMR (500 MHz,  $\text{CDCl}_3$ ):  $\delta$  (ppm) = 7.44 (d,  $J$  = 8.0 Hz, 2H), 7.36-7.26 (m, 6H), 7.16 (d,  $J$  = 8.0 Hz, 2H), 7.09-7.03 (m, 2H), 6.87 (d,  $J$  = 7.5 Hz, 1H), 5.34 (s, 1H), 4.12-4.08 (m, 1H), 4.01 (d,  $J$  = 12.0, 2.5 Hz, 1H), 3.20 (dd,  $J$  = 8.5, 2.5 Hz, 1H), 3.00-2.96 (m, 2H), 2.70 (d,  $J$  = 13.5 Hz, 1H), 2.38 (s, 3H), 2.06 (d,  $J$  = 13.5 Hz, 1H), 1.13-0.85 (m, 7H).  $^{13}\text{C}$  NMR (125 MHz,  $\text{CDCl}_3$ ):  $\delta$  (ppm) = 179.1, 176.0, 143.6, 137.2, 136.9, 136.2, 132.5, 130.7, 129.7, 129.6, 128.8, 128.5, 128.1, 127.8, 127.1, 126.5, 122.8, 69.3, 61.0, 50.6, 48.1, 39.2, 38.6, 29.3, 21.5, 19.8, 13.5. HRMS: Calcd for  $\text{C}_{30}\text{H}_{32}\text{BrN}_2\text{O}_4\text{S}$   $[\text{M}+\text{H}]^+$  595.1266, Found 595.1265.

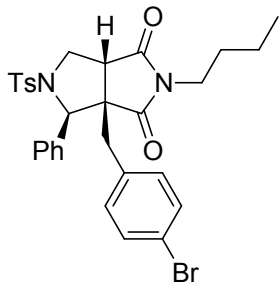

**(5d)**: white solid: m. p. 173-175 °C.  $^1\text{H}$  NMR (500 MHz,  $\text{CDCl}_3$ ):  $\delta$  (ppm) = 7.41 (d,  $J$  = 8.0 Hz, 2H), 7.33-7.23 (m, 7H), 7.14 (d,  $J$  = 8.0 Hz, 2H), 6.80 (d,  $J$  = 3.5 Hz, 2H), 5.32 (s, 1H), 4.09-4.06 (m, 1H), 3.98 (dd,  $J$  = 12.0, 2.5 Hz, 1H), 3.18 (dd,  $J$  = 9.0, 2.5 Hz, 1H), 2.98-2.94 (m, 2H), 2.65 (d,  $J$  = 14.0 Hz, 1H), 2.36 (s, 3H), 2.05 (d,  $J$  = 13.5 Hz, 1H), 1.02-0.97 (m, 7H).  $^{13}\text{C}$  NMR (125 MHz,  $\text{CDCl}_3$ ):  $\delta$  (ppm) = 179.1, 176.1, 143.5, 136.9, 135.1, 133.8, 131.9, 131.2, 129.5, 128.8, 128.5, 127.8, 127.1, 121.7, 69.2, 61.0, 50.6, 48.3, 39.1, 38.5, 29.3, 21.5, 19.8, 13.6.  $\text{C}_{30}\text{H}_{32}\text{BrN}_2\text{O}_4\text{S}$   $[\text{M}+\text{H}]^+$  595.1266, Found 595.1271.



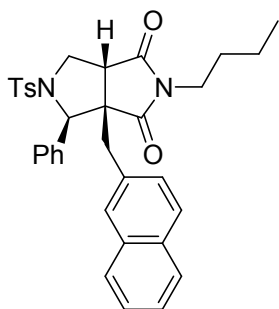

**(5i)**: white solid: m. p. 166-168 °C. <sup>1</sup>H NMR (500 MHz, CDCl<sub>3</sub>): δ (ppm) = 7.72-7.63 (m, 3H), 7.45-7.30 (m, 10H), 7.14 (d, *J* = 8.0 Hz, 2H), 7.02 (dd, *J* = 8.5, 2.0 Hz, 1H), 5.38 (s, 1H), 4.15-4.10 (m, 1H), 4.00 (dd, *J* = 12.0, 2.5 Hz, 1H), 3.33 (dd, *J* = 9.0, 2.5 Hz, 1H), 2.91-2.85 (m, 3H), 2.36 (s, 3H), 2.26 (d, *J* = 13.5 Hz, 1H), 0.82-0.49 (m, 7H). <sup>13</sup>C NMR (125 MHz, CDCl<sub>3</sub>): δ (ppm) = 179.4, 176.2, 143.5, 137.2, 135.2, 133.2, 129.5, 128.8, 128.6, 128.5, 127.9, 127.6, 127.5, 127.2, 127.1, 126.4, 126.1, 69.3, 61.5, 50.6, 48.4, 39.3, 39.0, 29.2, 21.4, 19.6, 13.2. HRMS: Calcd for C<sub>34</sub>H<sub>35</sub>N<sub>2</sub>O<sub>4</sub>S [M+H]<sup>+</sup> 567.2318, Found

567.2311.

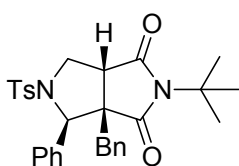

**(6a)**: white solid. m. p. 190-192 °C. <sup>1</sup>H NMR (500 MHz, CDCl<sub>3</sub>): δ (ppm) = 7.44 (d, *J* = 8.0 Hz, 2H), 7.34-7.30 (m, 3H), 7.24-7.23 (m, 2H), 7.18-7.13 (m, 5H), 6.96-6.94 (m, 2H), 5.34 (s, 1H), 4.09-4.05 (m, 1H), 3.81 (dd, *J* = 11.5, 2.5 Hz, 1H), 3.16 (dd, *J* = 14.0, 2.5 Hz, 1H), 2.66 (d, *J* = 13.5 Hz, 1H), 2.35 (s, 3H), 2.06 (d, *J* = 13.5 Hz, 1H), 1.15 (s, 9H). <sup>13</sup>C NMR (125 MHz, CDCl<sub>3</sub>): δ (ppm) = 180.1, 177.4, 143.5, 137.5, 135.3, 134.9, 129.6, 129.5, 128.7, 128.3, 127.8, 127.5, 127.3, 69.7, 60.7, 58.6, 50.9, 48.1, 39.4, 27.6, 21.4. HRMS: Calcd for C<sub>30</sub>H<sub>33</sub>N<sub>2</sub>O<sub>4</sub>S [M+H]<sup>+</sup> 517.2161, Found 517.2152.

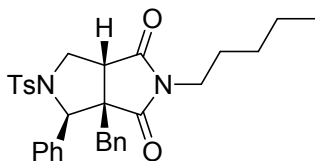

**(6b)**: white solid: m. p. 164-165 °C. <sup>1</sup>H NMR (500 MHz, CDCl<sub>3</sub>): δ (ppm) = 7.41 (d, *J* = 8.5 Hz, 2H), 7.34-7.24 (m, 5H), 7.14-7.13 (m, 5H), 6.92-6.90 (m, 2H), 5.34 (s, 1H), 4.10-4.06 (m, 1H), 3.97 (dd, *J* = 11.5, 2.5 Hz, 1H), 3.23 (d, *J* = 9.0, 2.5 Hz, 1H), 2.93-2.88 (m, 2H), 2.71 (d, *J* = 13.5 Hz, 1H), 2.36 (s, 3H), 2.08 (d, *J* = 13.5 Hz, 1H), 1.19-0.89 (m, 6H), 0.83-

0.80 (m, 3H). <sup>13</sup>C NMR (125 MHz, CDCl<sub>3</sub>): δ (ppm) = 179.4, 176.3, 143.5, 137.1, 135.2, 129.5, 129.4, 128.8, 128.7, 128.4, 127.8, 127.5, 127.1, 69.3, 61.3, 50.5, 48.3, 39.2, 39.1, 28.6, 26.8, 22.1, 21.5, 13.8. HRMS: Calcd for C<sub>31</sub>H<sub>35</sub>N<sub>2</sub>O<sub>4</sub>S [M+H]<sup>+</sup> 531.2318, Found 531.2310.

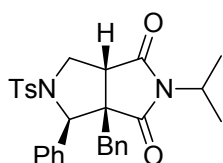

**(6c)**: white solid: m. p. 188-189 °C. <sup>1</sup>H NMR (500 MHz, CDCl<sub>3</sub>): δ (ppm) = 7.41-7.39 (m, 2H), 7.33-7.31 (m, 3H), 7.23-7.22 (m, 2H), 7.18-7.10 (m, 5H), 6.95-6.93 (m, 2H), 5.36 (s, 1H), 4.07-4.03 (m, 1H), 3.99-3.94 (m, 1H), 3.84 (dd, *J* = 11.5, 2.5 Hz, 1H), 3.23 (dd, *J* = 9.5, 3.0 Hz, 1H), 2.70 (d, *J* = 13.5 Hz, 1H), 2.34 (s, 3H), 2.12 (d, *J* = 13.5 Hz, 1H), 0.97 (d, *J* = 7.0 Hz, 3H), 0.89

(d, *J* = 7.0 Hz, 3H). <sup>13</sup>C NMR (125 MHz, CDCl<sub>3</sub>): δ (ppm) = 179.3, 176.3, 143.5, 137.1, 135.3, 134.8, 129.5, 129.4, 128.8, 128.4, 127.9, 127.5, 127.2, 69.3, 60.9, 50.5, 48.1, 44.2, 39.1, 21.5, 18.6, 18.5. HRMS: Calcd for C<sub>29</sub>H<sub>31</sub>N<sub>2</sub>O<sub>4</sub>S [M+H]<sup>+</sup> 503.2005, Found 503.1999.



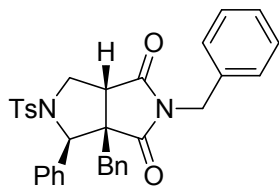

**(6d)**: white solid: m. p. 174-175 °C.  $^1\text{H}$  NMR (500 MHz,  $\text{CDCl}_3$ ):  $\delta$  (ppm) = 7.42 (d,  $J$  = 8.0 Hz, 2H), 7.32-7.14 (m, 10H), 7.02-6.97 (m, 3H), 6.89-6.86 (m, 2H), 6.72 (d,  $J$  = 8.5 Hz, 2H), 5.35 (s, 1H), 4.18 (d,  $J$  = 14.5 Hz, 1H), 4.12 (d,  $J$  = 14.5 Hz, 1H), 4.08-4.01 (m, 2H), 3.21 (d,  $J$  = 9.0, 3.0 Hz, 1H), 2.73 (d,  $J$  = 13.5 Hz, 1H), 2.38 (s, 3H), 2.06 (d,  $J$  = 13.5 Hz, 1H).  $^{13}\text{C}$  NMR (125 MHz,  $\text{CDCl}_3$ ):  $\delta$  (ppm) = 179.4, 175.9, 143.5, 136.9, 135.1, 134.6, 134.4, 129.6, 129.2, 128.8, 128.6, 128.5, 128.4, 128.3, 127.8, 127.7, 127.3, 127.2, 69.5, 61.3, 50.4, 48.2, 42.8, 38.8, 21.5. HRMS: Calcd for  $\text{C}_{33}\text{H}_{31}\text{N}_2\text{O}_4\text{S}$   $[\text{M}+\text{H}]^+$  551.2005, Found 551.1999.

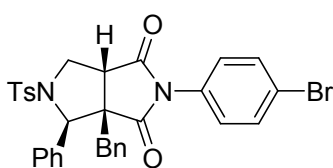

**(6e)**: white solid: m. p. 195-196 °C.  $^1\text{H}$  NMR (500 MHz,  $\text{CDCl}_3$ ):  $\delta$  (ppm) = 7.45-7.43 (m, 4H), 7.37-7.33 (m, 3H), 7.28-7.20 (m, 5H), 7.13-7.12 (m, 2H), 6.99-6.97 (m, 2H), 6.48 (d,  $J$  = 9.0 Hz, 2H), 5.55 (s, 1H), 4.19-4.15 (m, 1H), 4.00 (d,  $J$  = 9.0, 3.0 Hz, 1H), 3.46 (dd,  $J$  = 9.5, 2.5 Hz, 1H), 2.82 (d,  $J$  = 13.5 Hz, 1H), 2.35 (s, 3H), 2.20 (d,  $J$  = 13.5 Hz, 1H).  $^{13}\text{C}$  NMR (125 MHz,  $\text{CDCl}_3$ ):  $\delta$  (ppm) = 178.2, 174.9, 143.7, 136.9, 135.2, 134.7, 132.1, 130.0, 129.6, 129.4, 129.0, 128.9, 128.6, 127.8, 127.7, 127.3, 122.7, 69.1, 62.2, 50.6, 48.6, 39.5, 21.5. HRMS: Calcd for  $\text{C}_{32}\text{H}_{28}\text{BrN}_2\text{O}_4\text{S}$   $[\text{M}+\text{H}]^+$  615.0953, Found 615.0949.

# 4 <sup>1</sup>H NMR and <sup>13</sup>C NMR Spectra of All Compounds

## Compound 4a

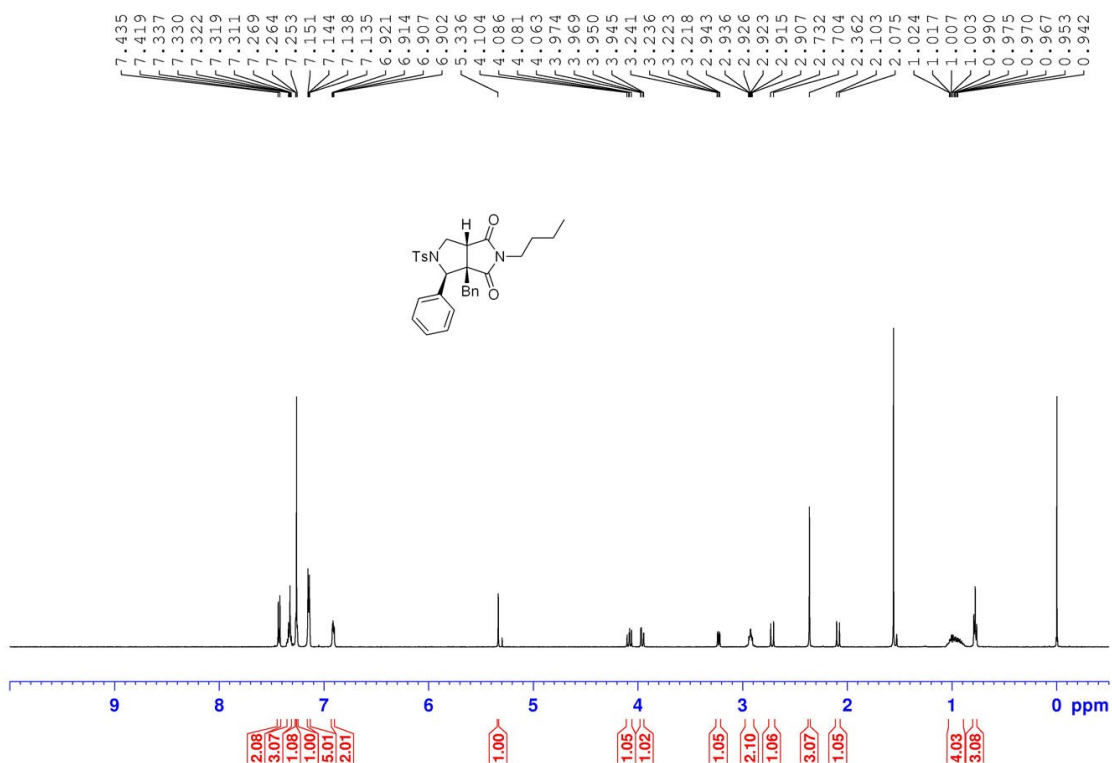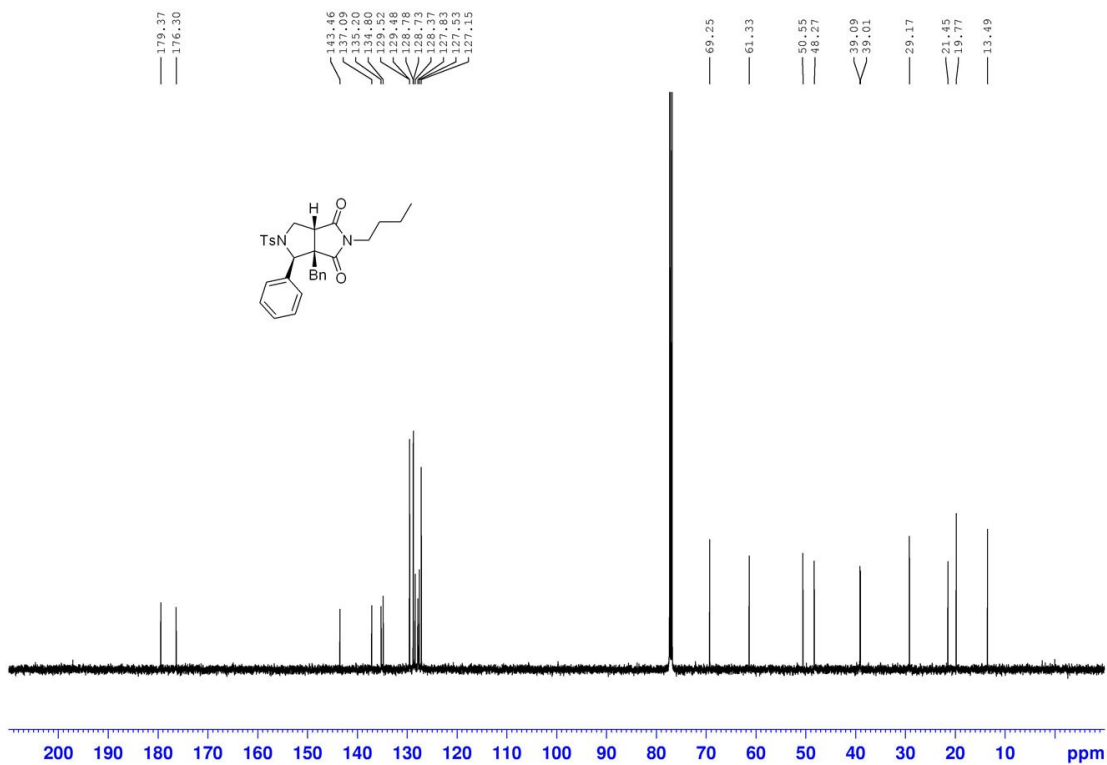

# Compound 4b

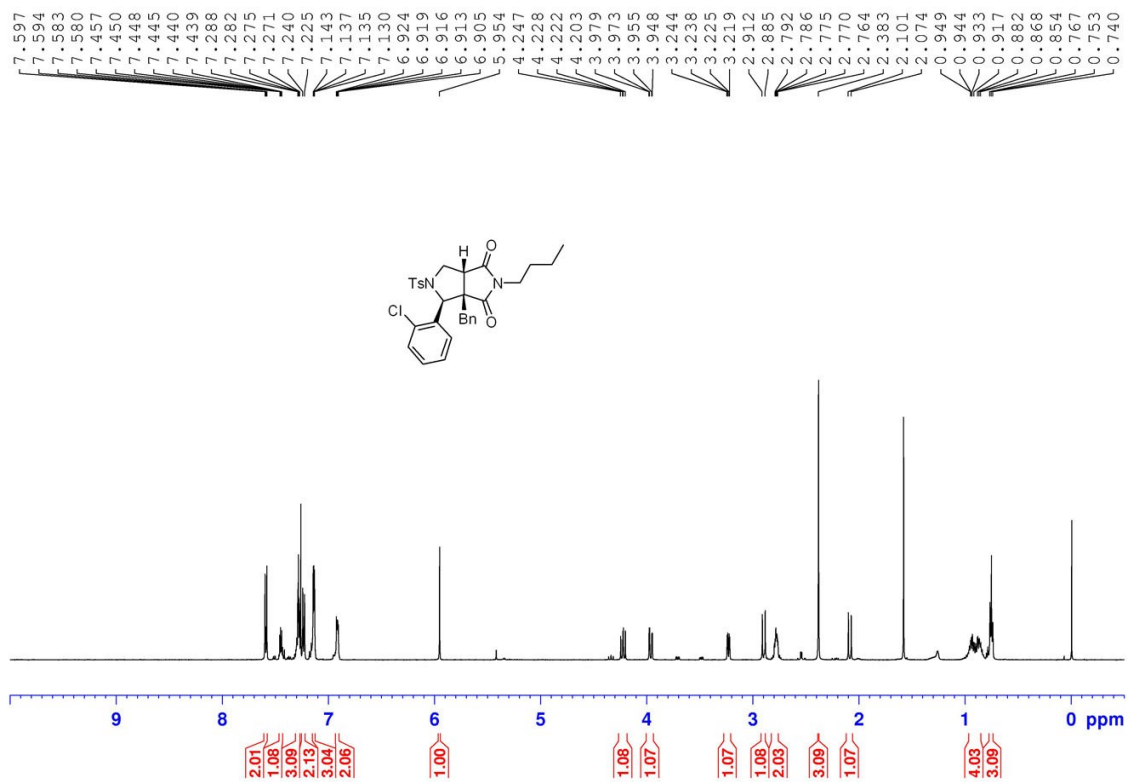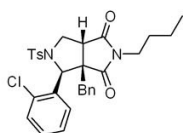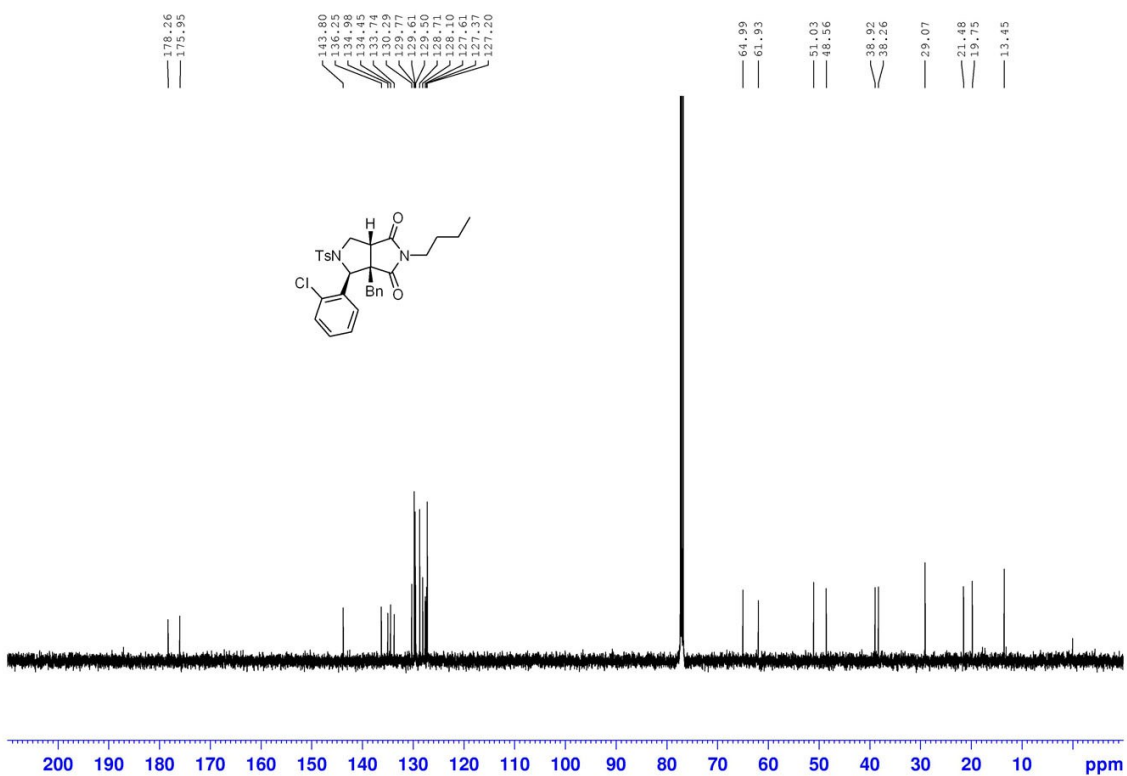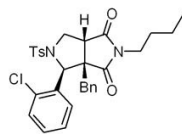

# Compound 4c

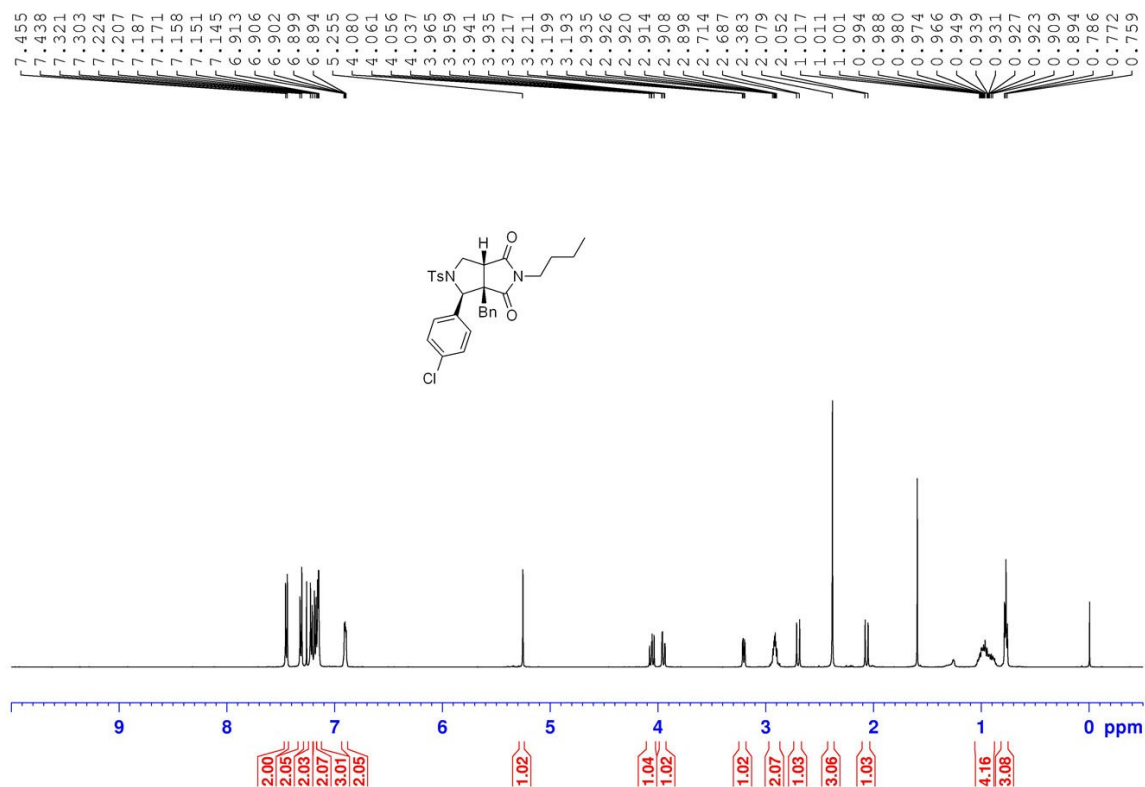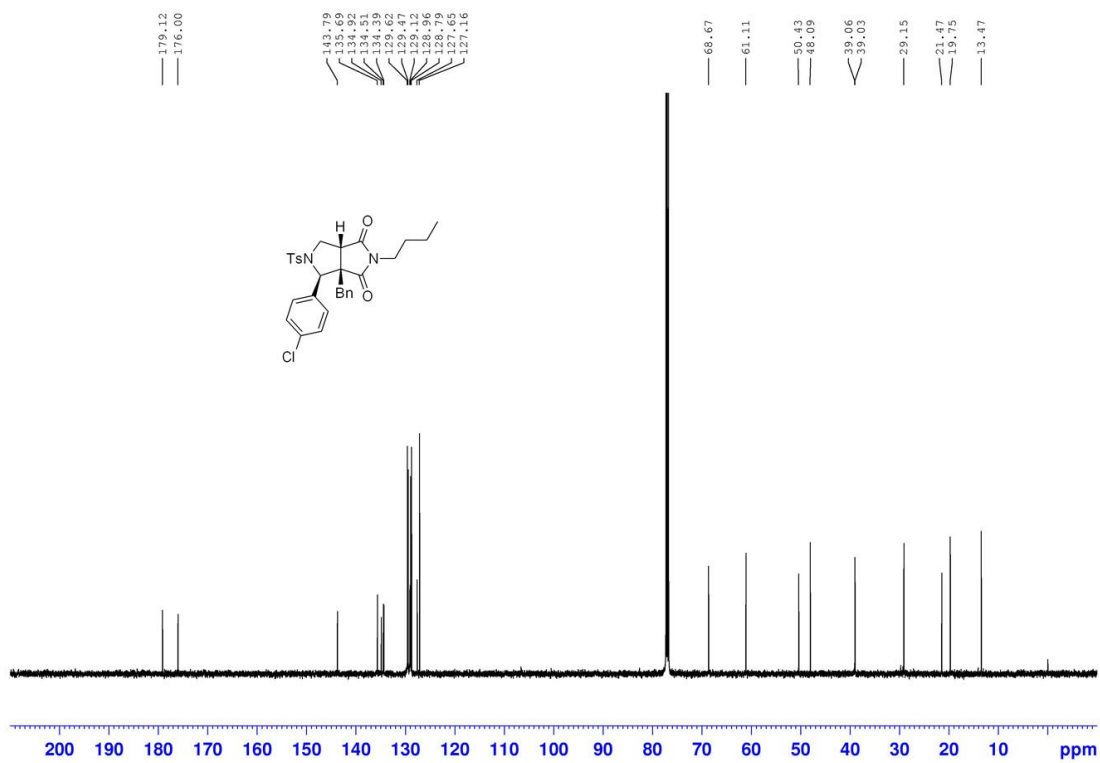

# Compound 4d

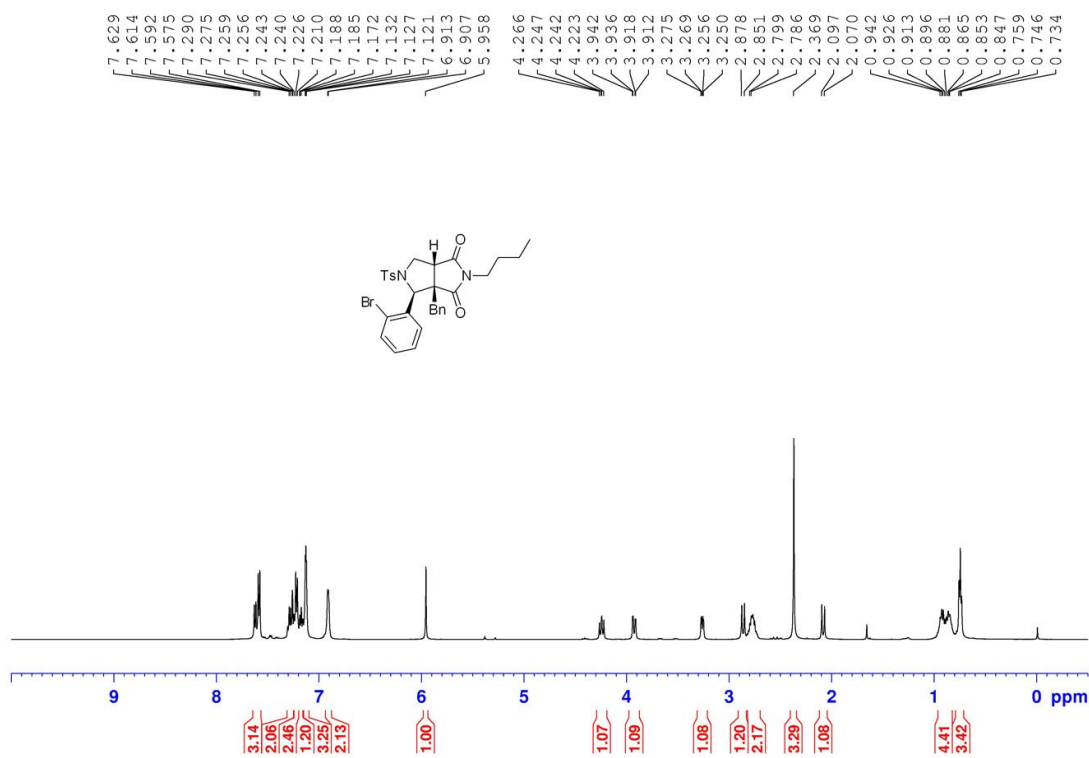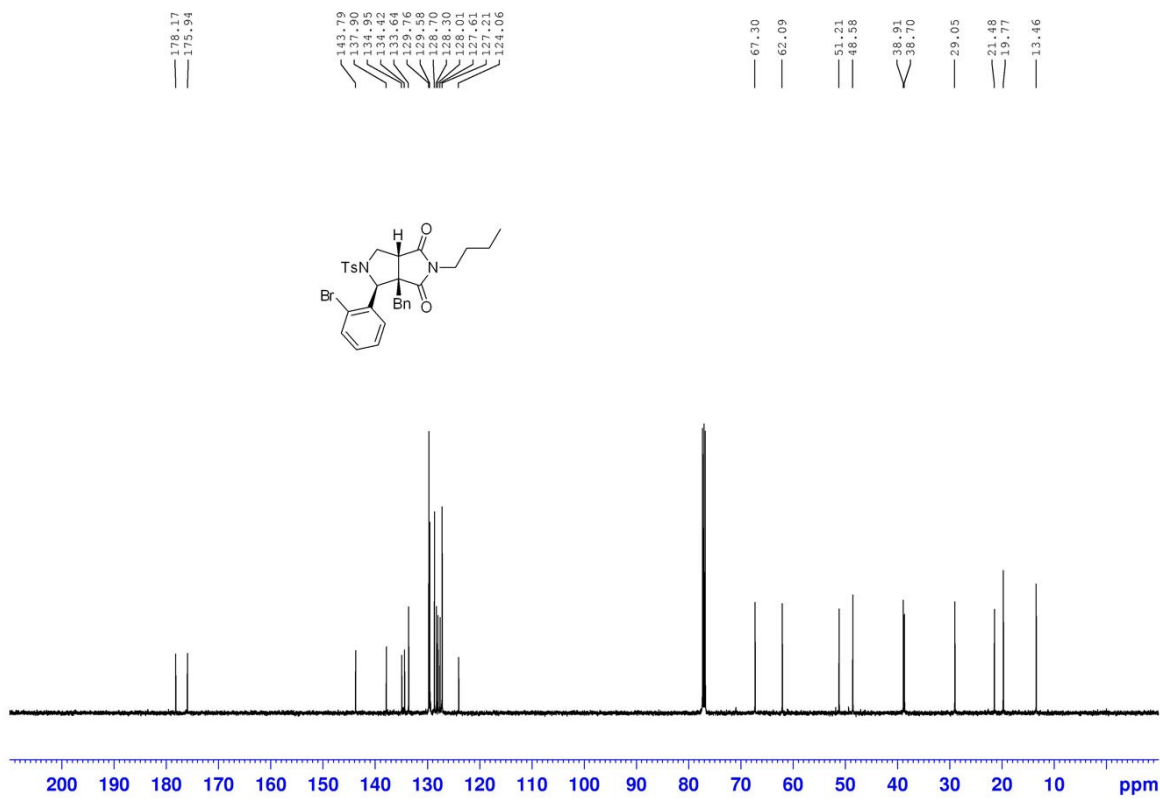

# Compound 4e

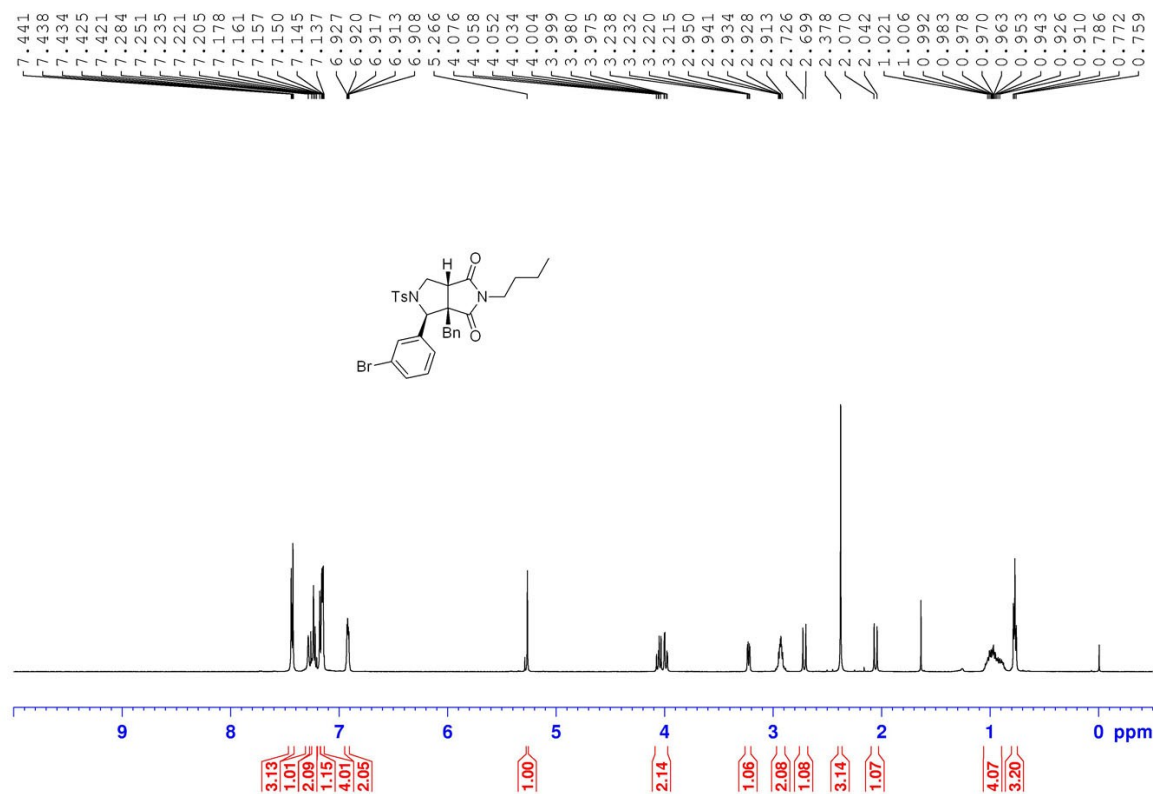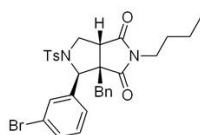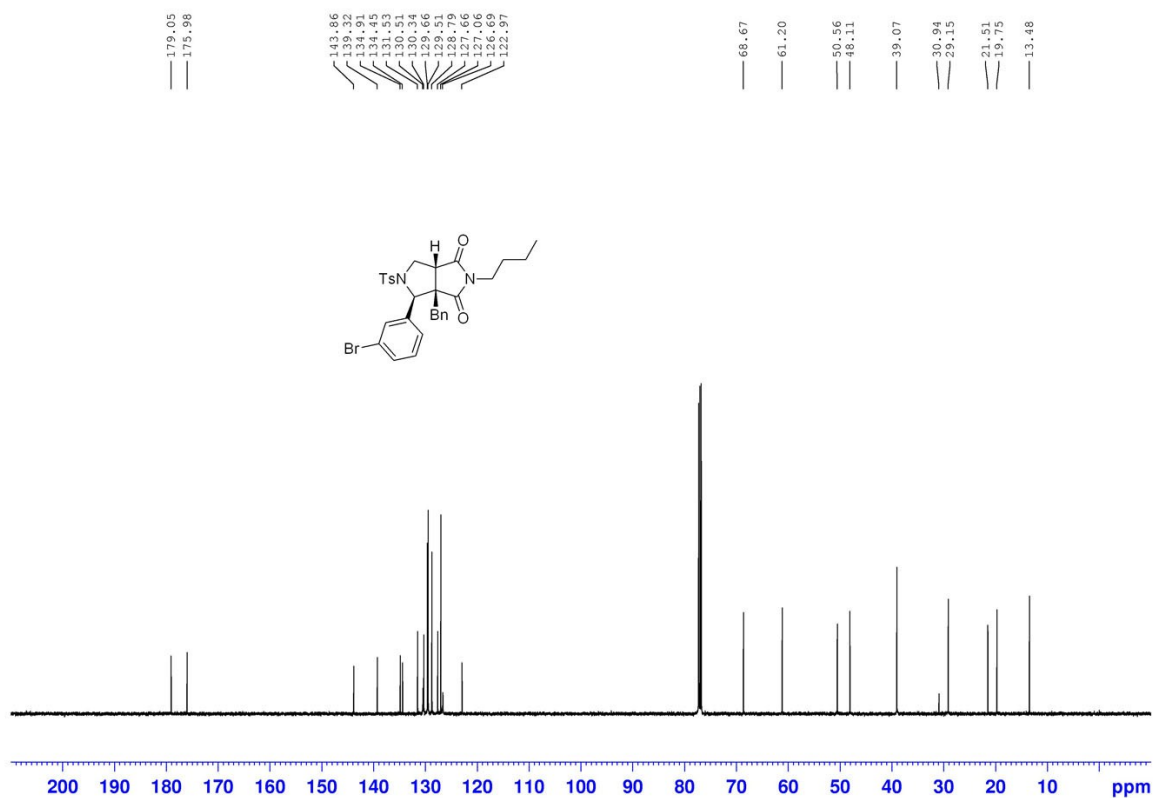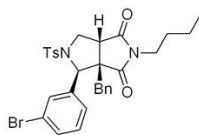

# Compound 4f

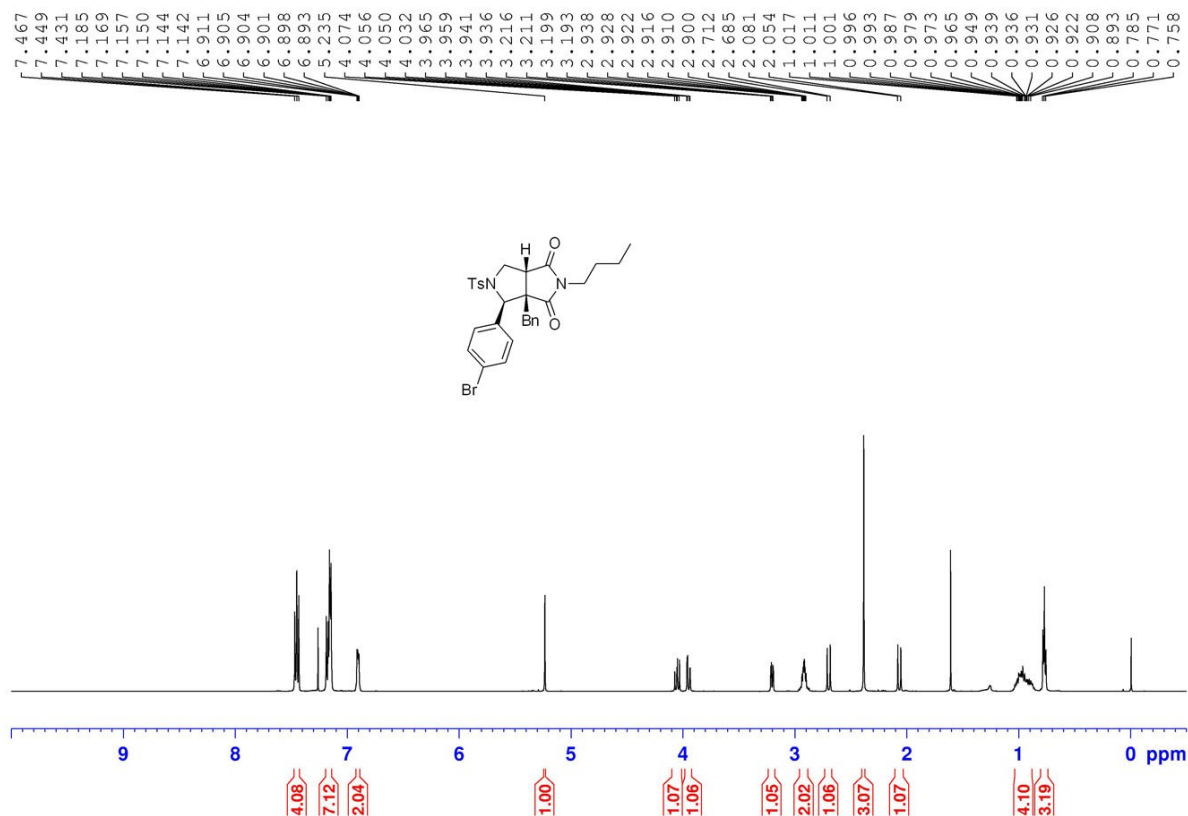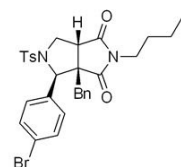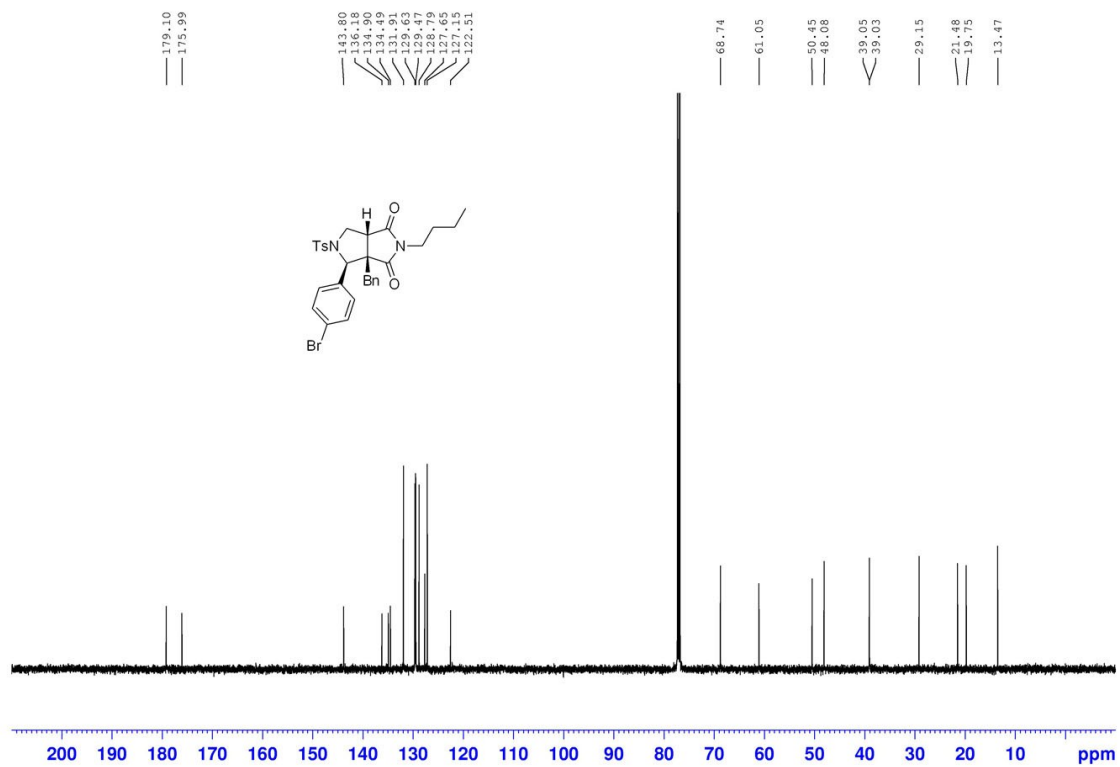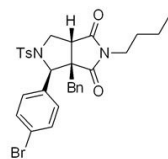

# Compound 4g

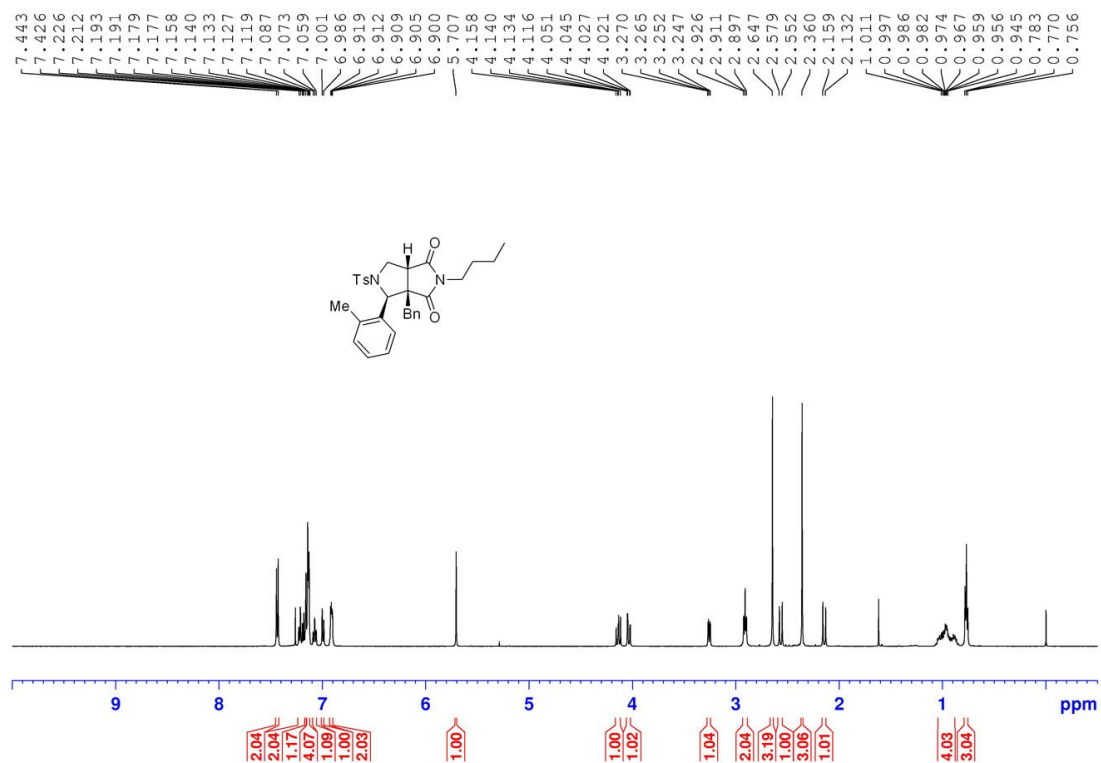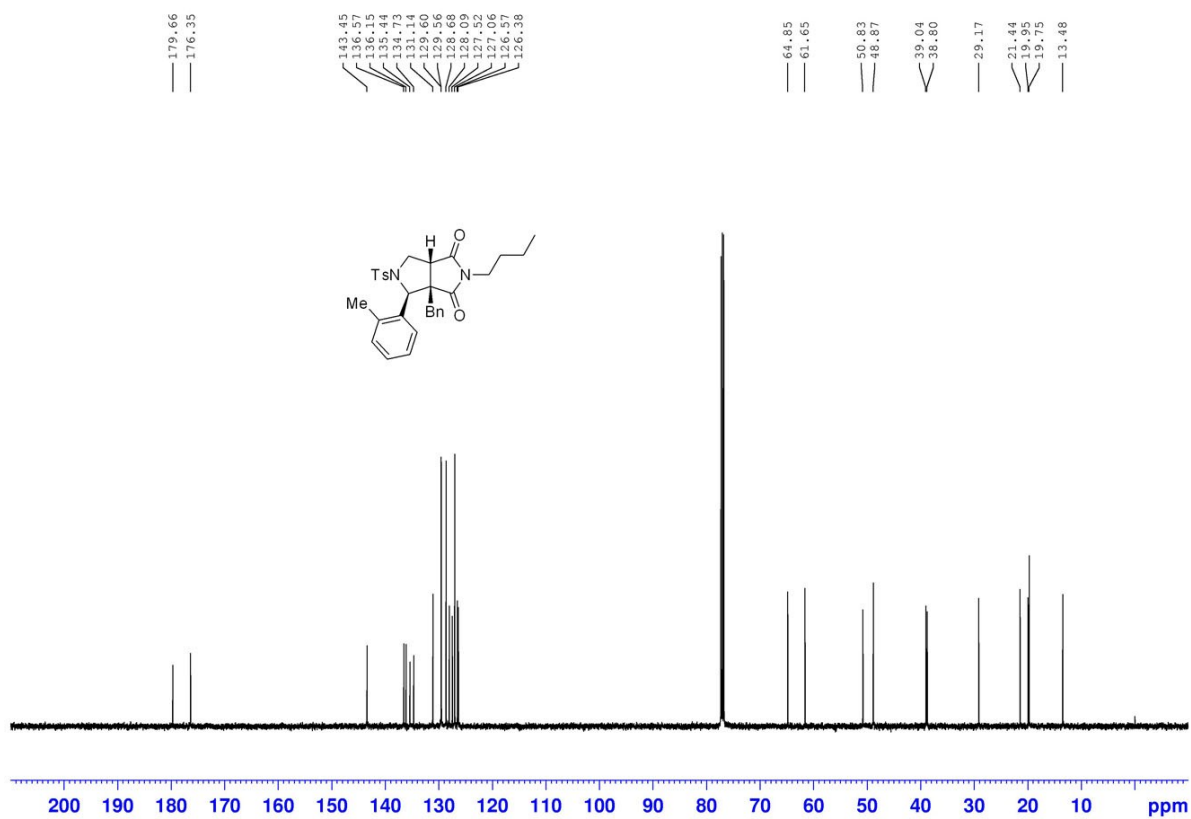



# Compound 4h

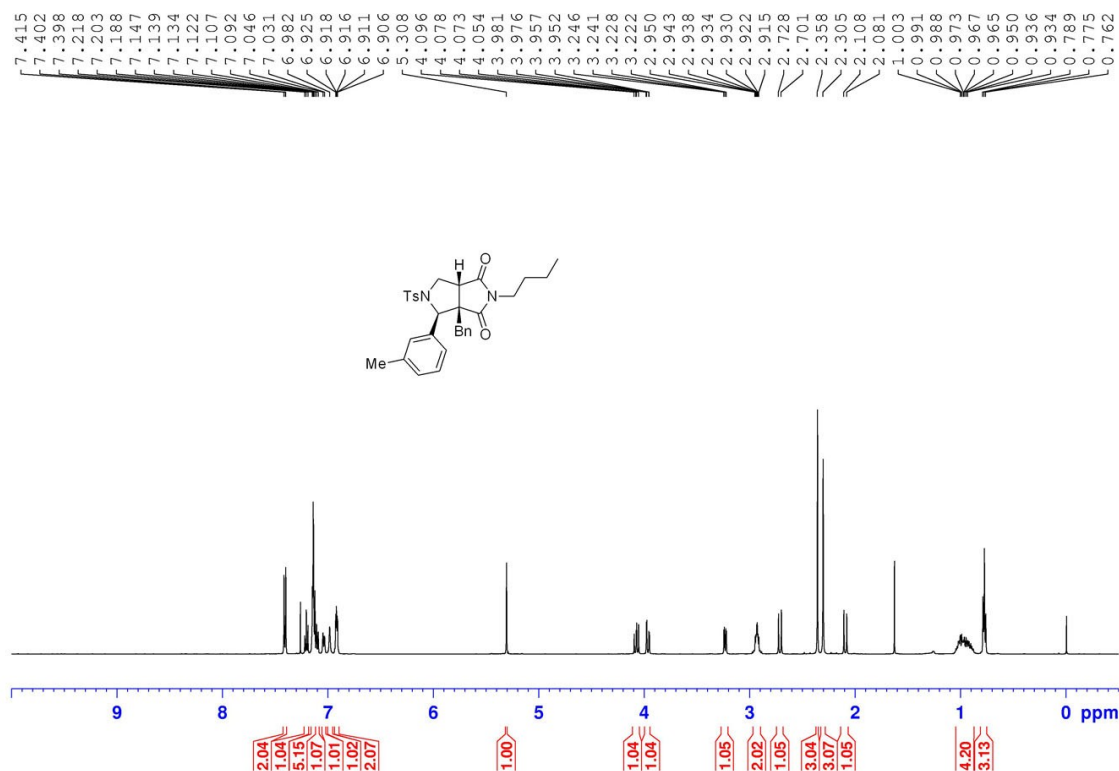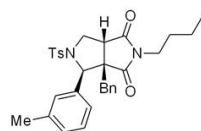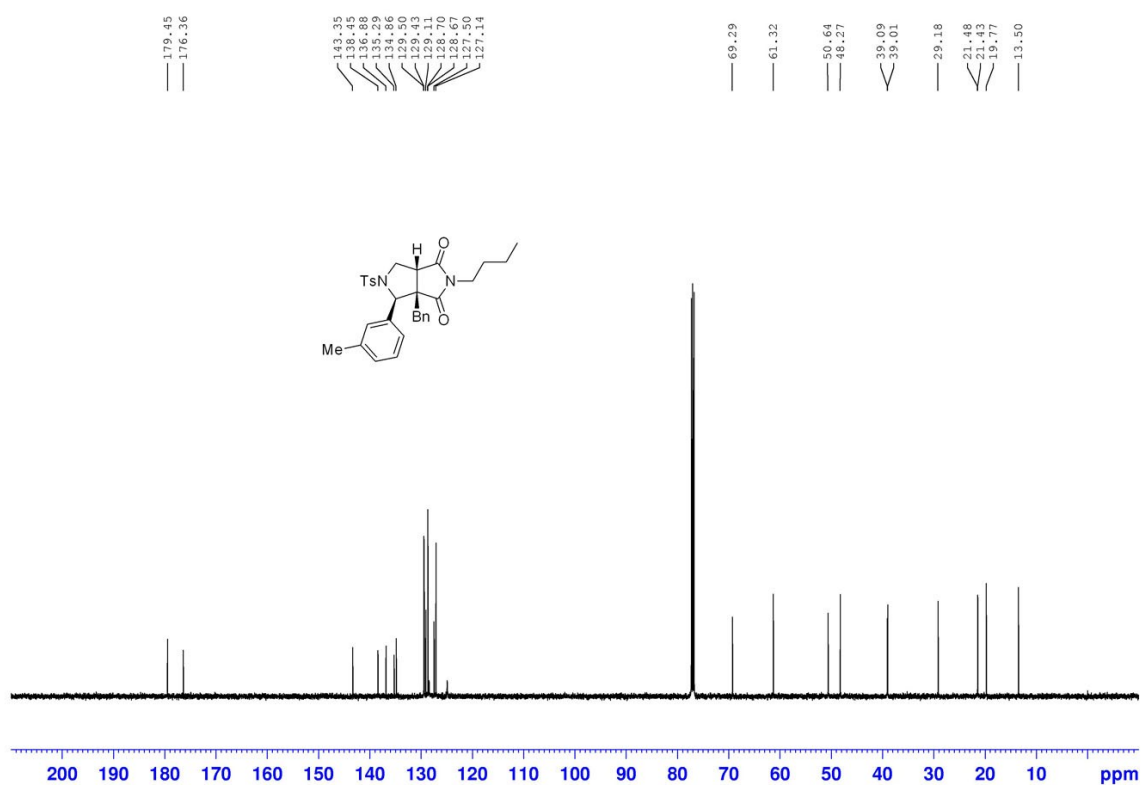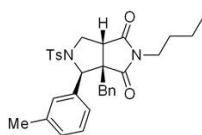

# Compound 4i

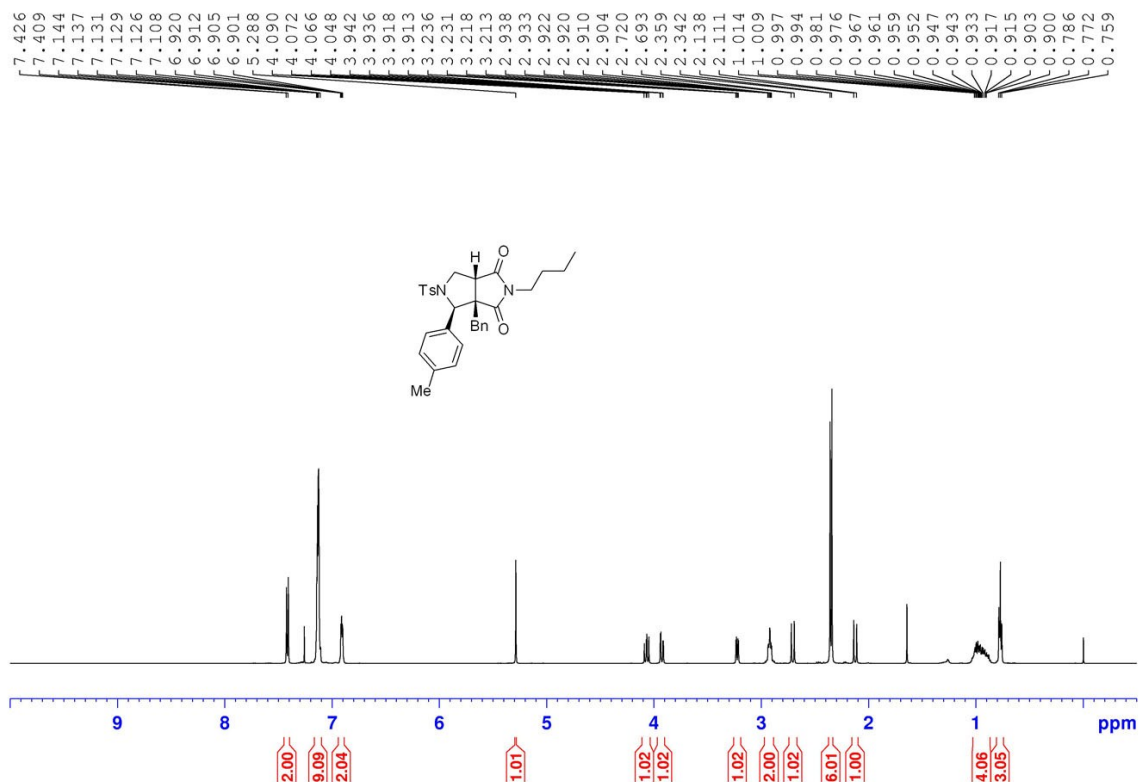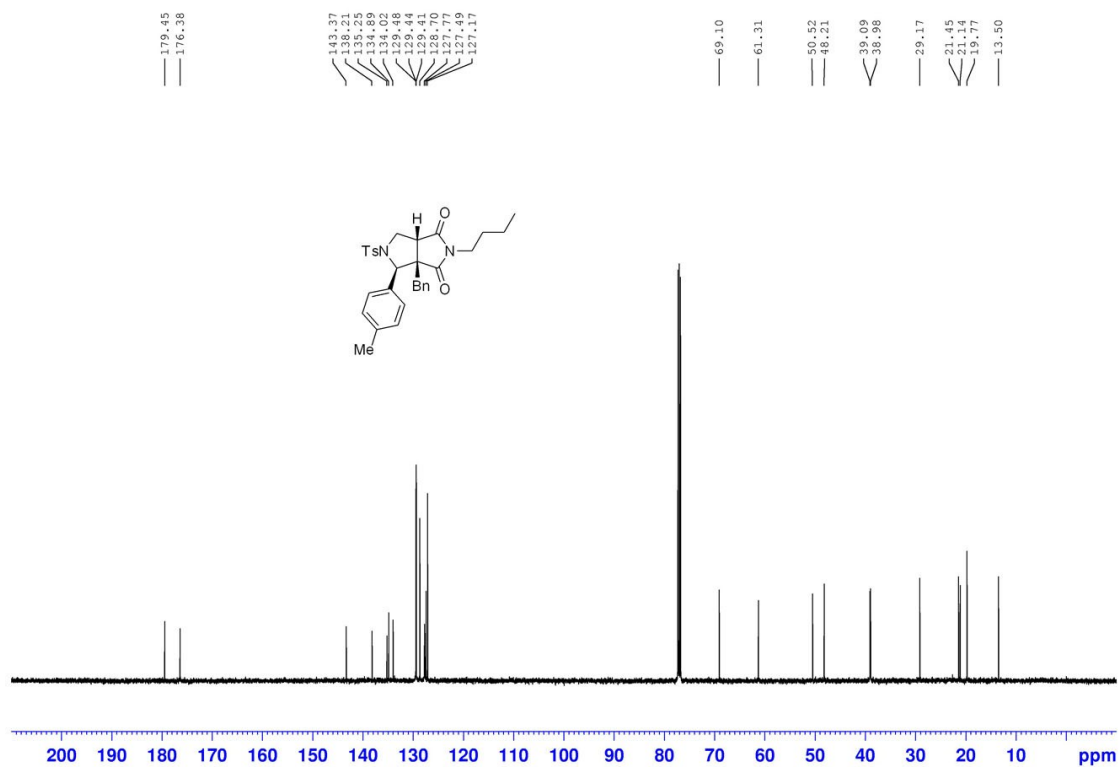

# Compound 4j

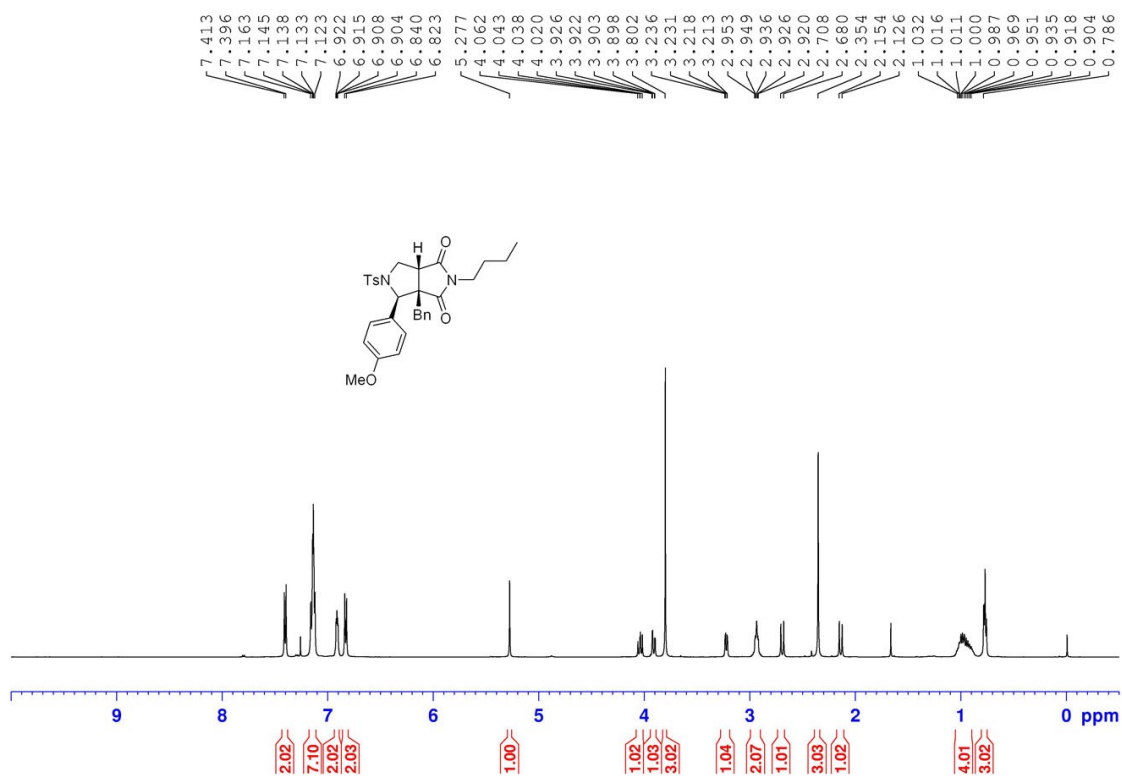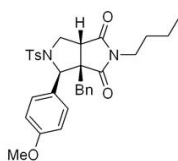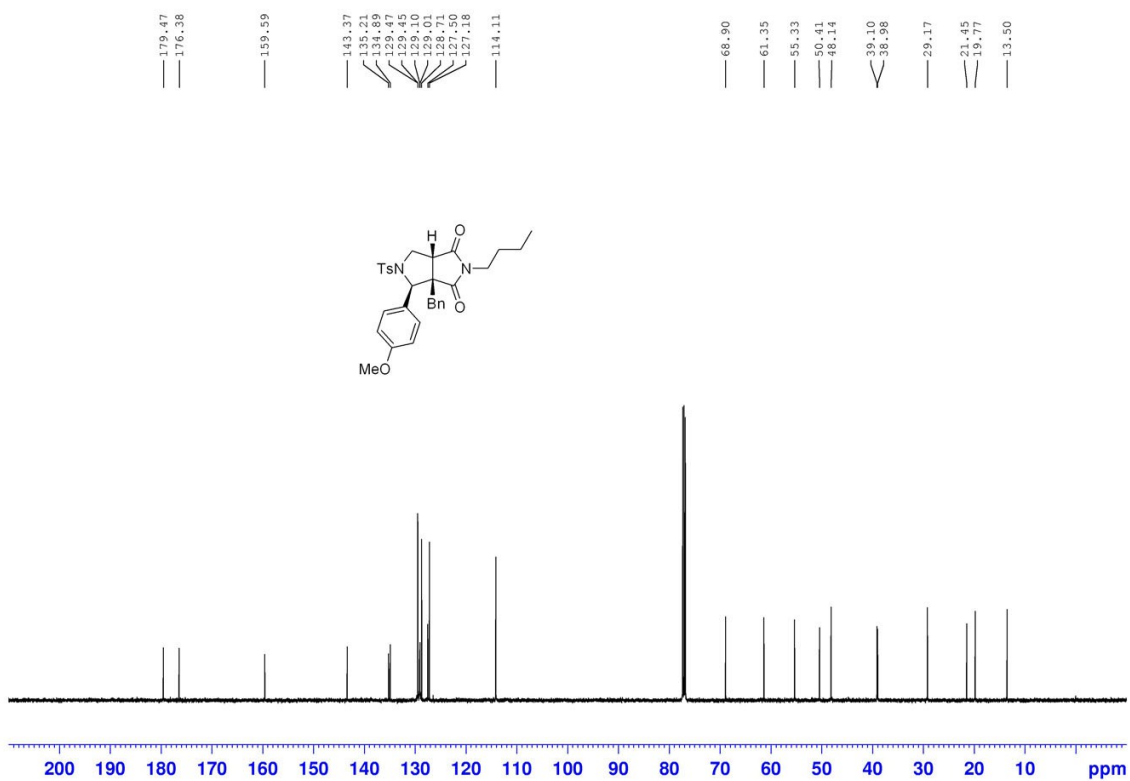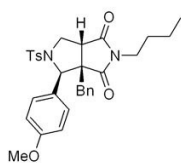

# Compound 4k

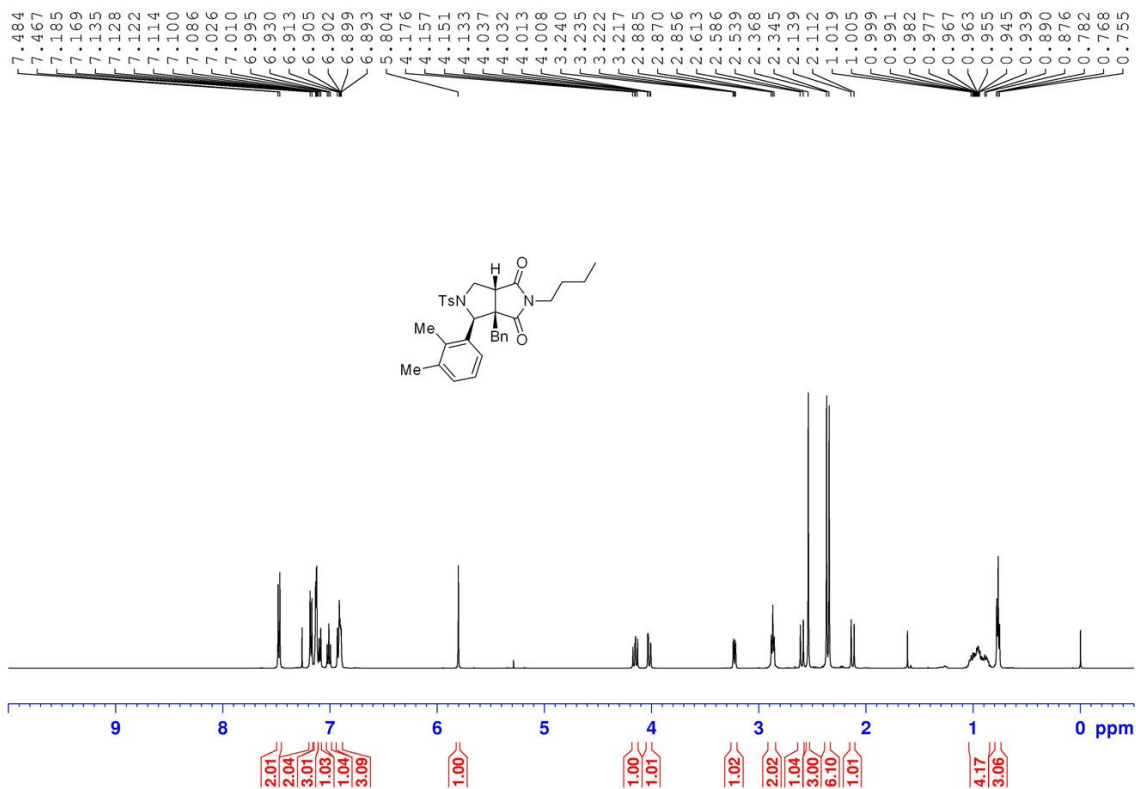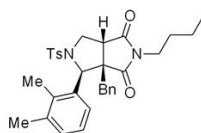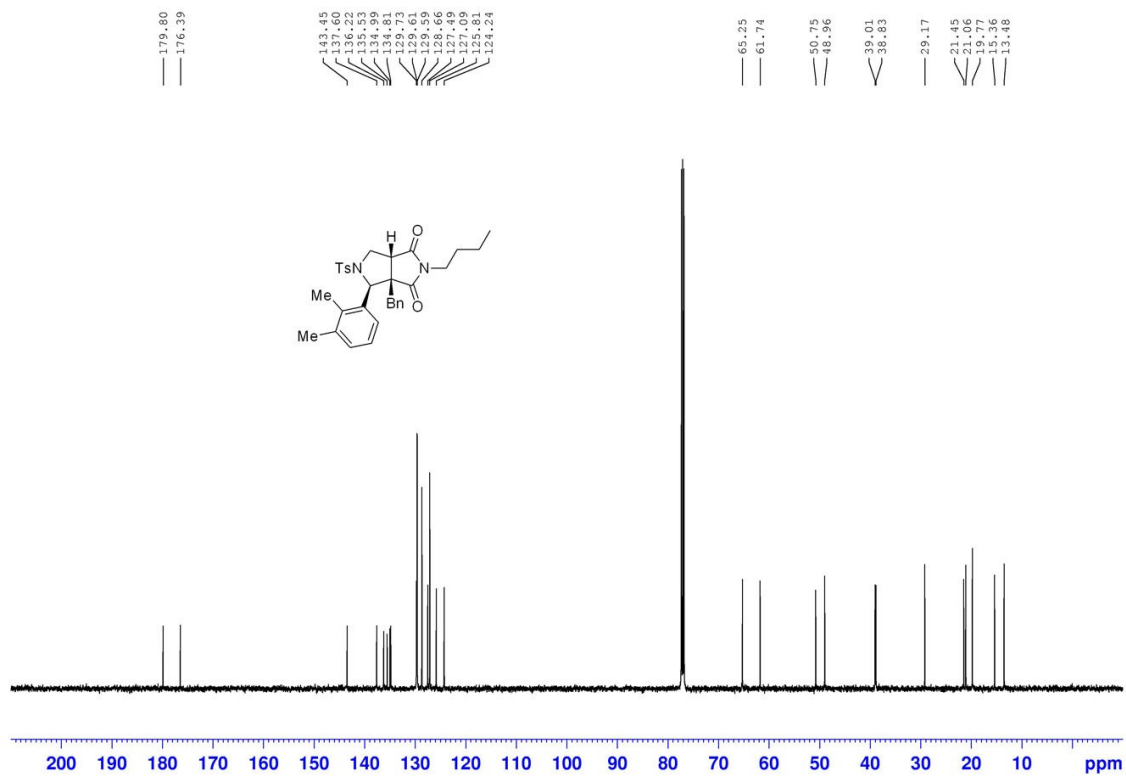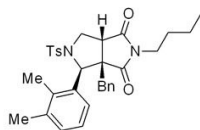

# Compound 4l

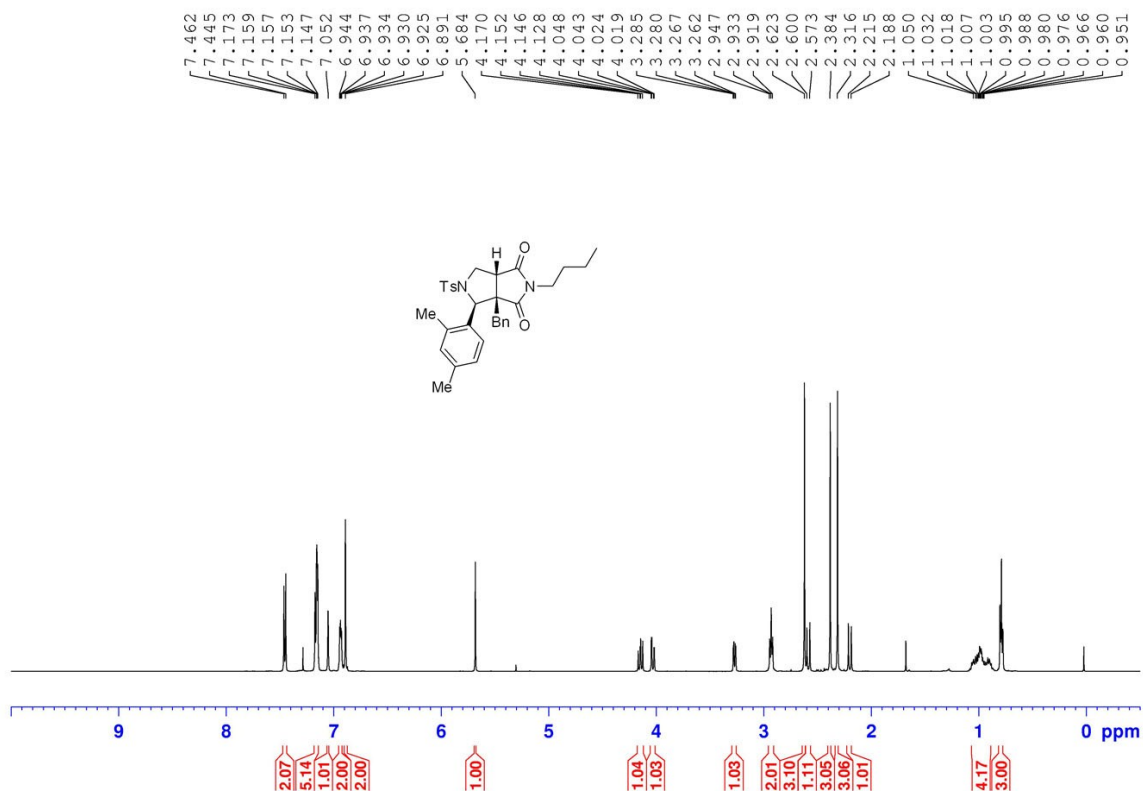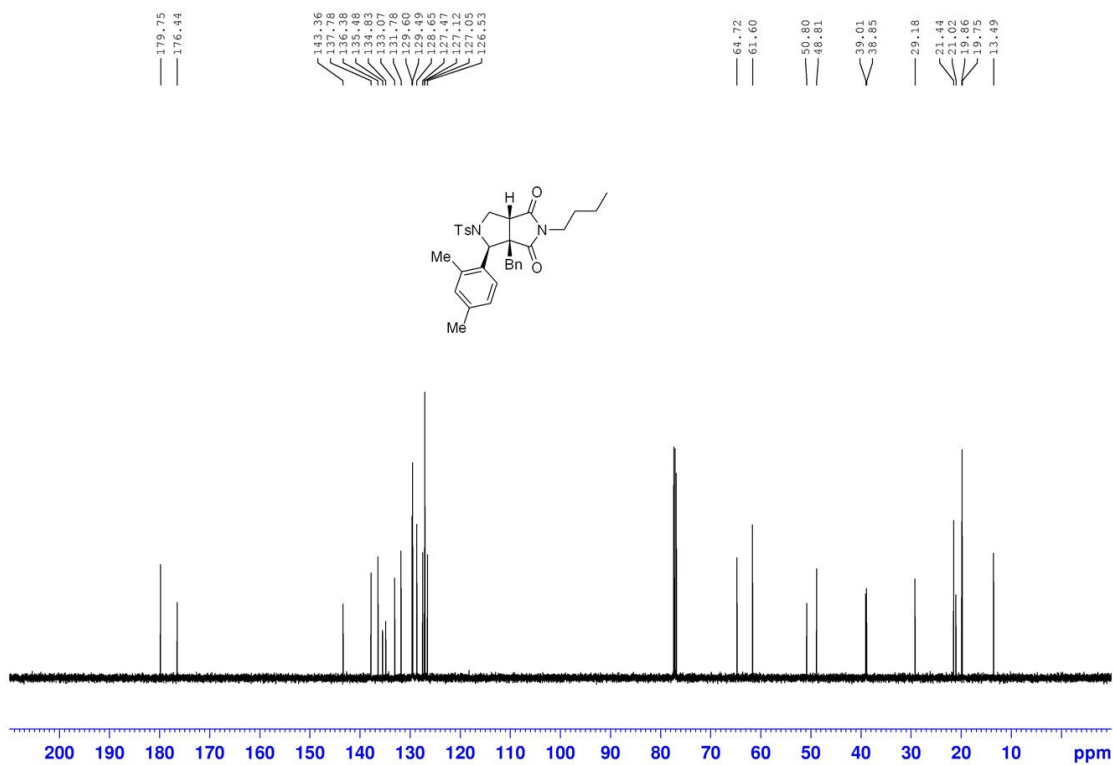

# Compound 5a

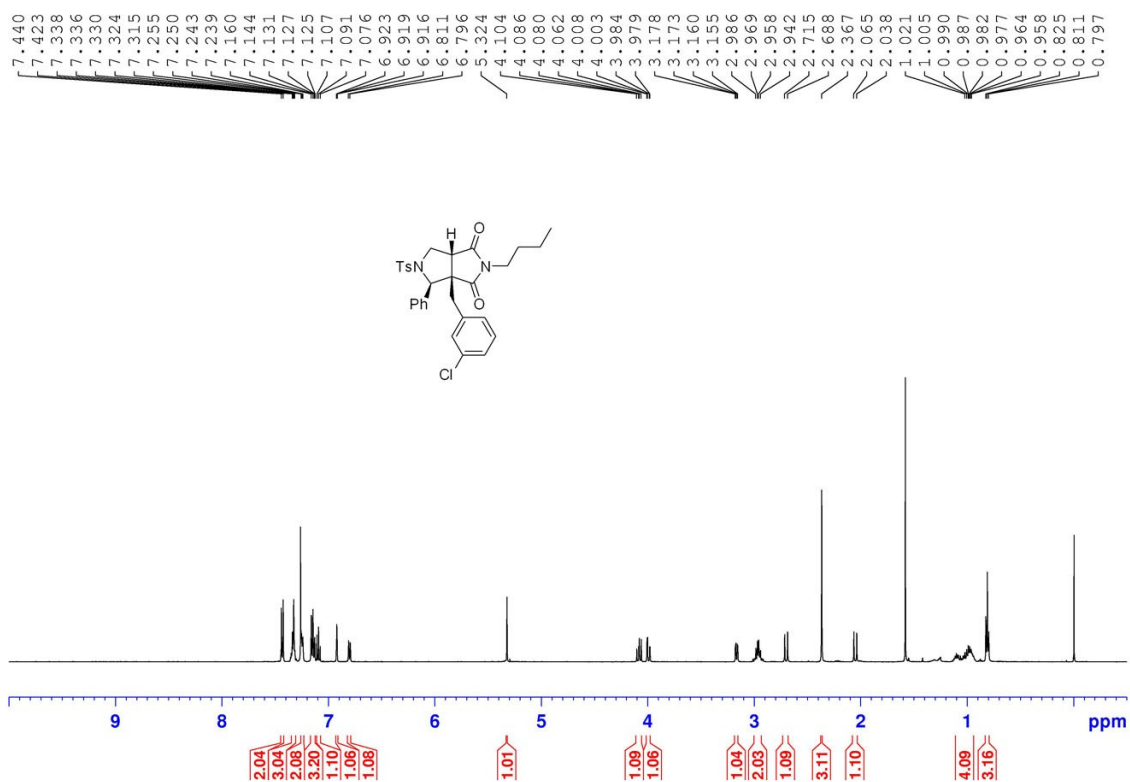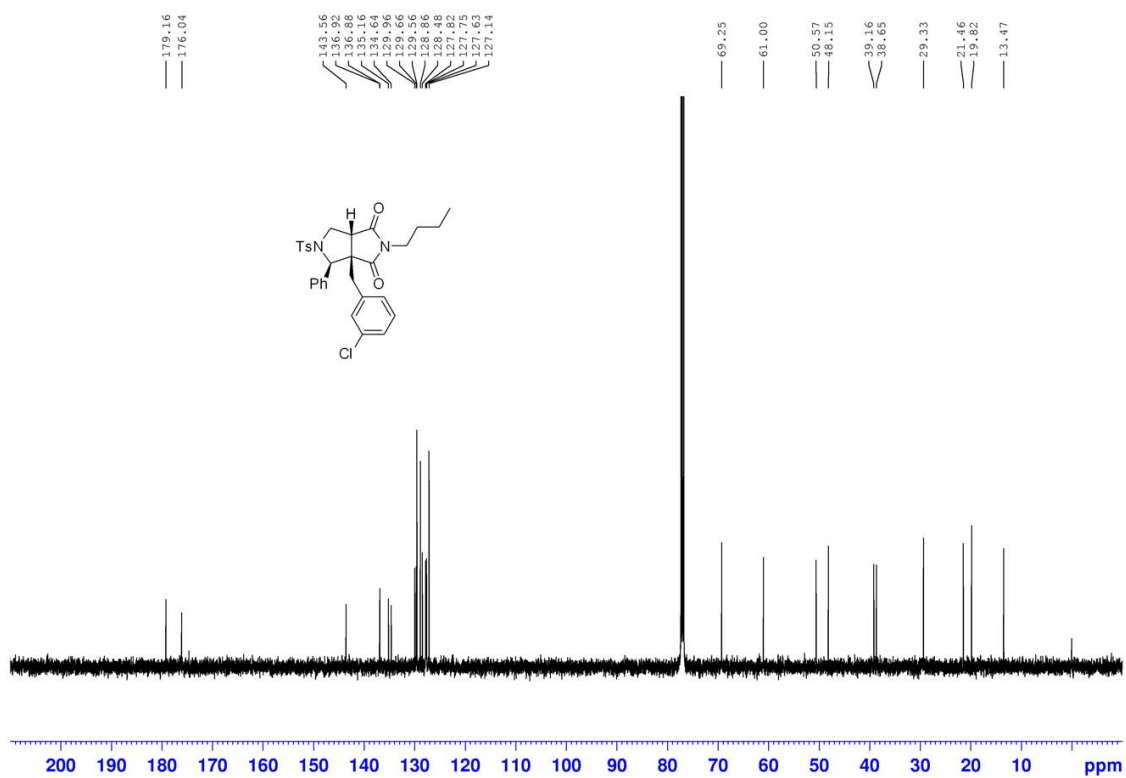

# Compound 5b

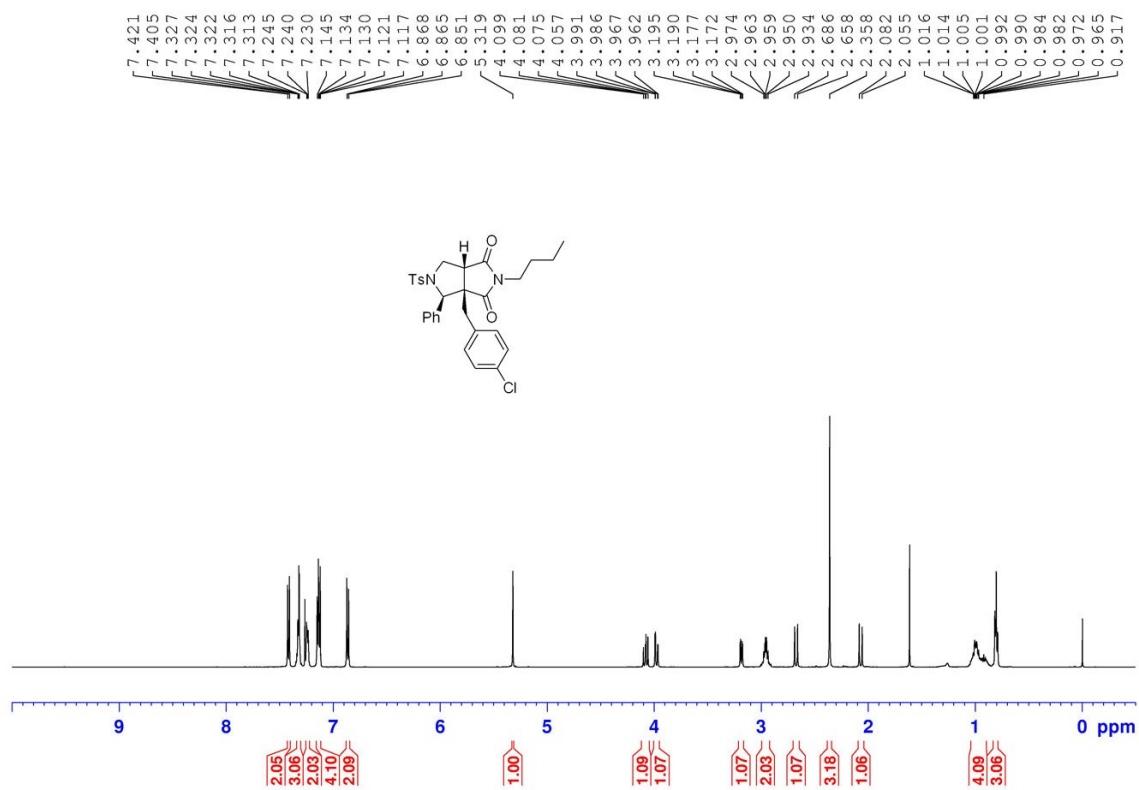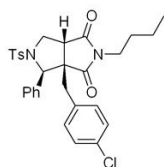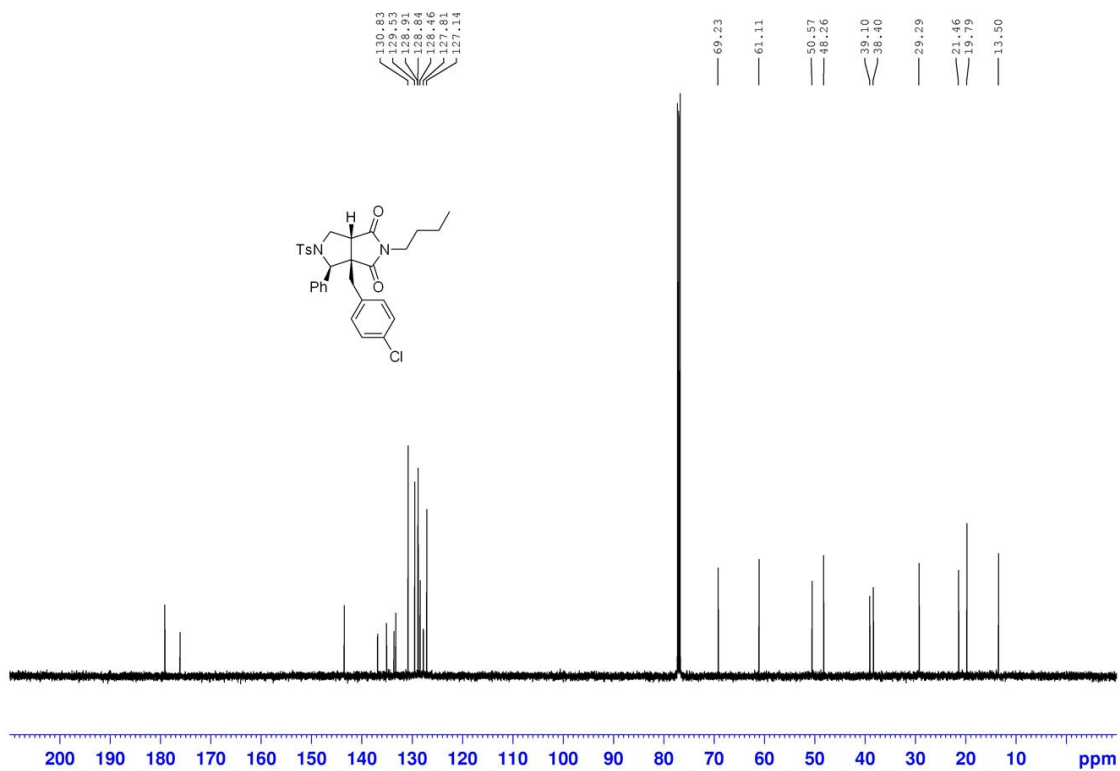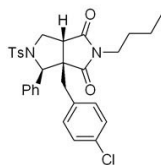

# Compound 5c

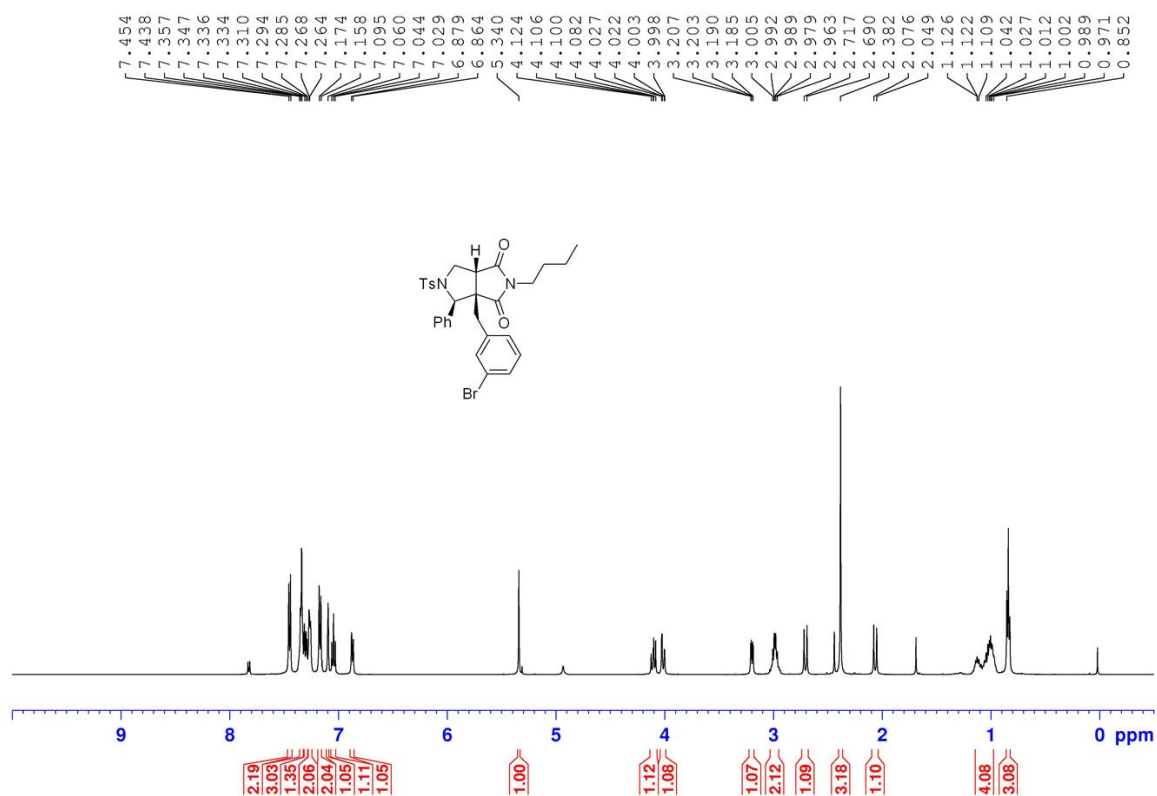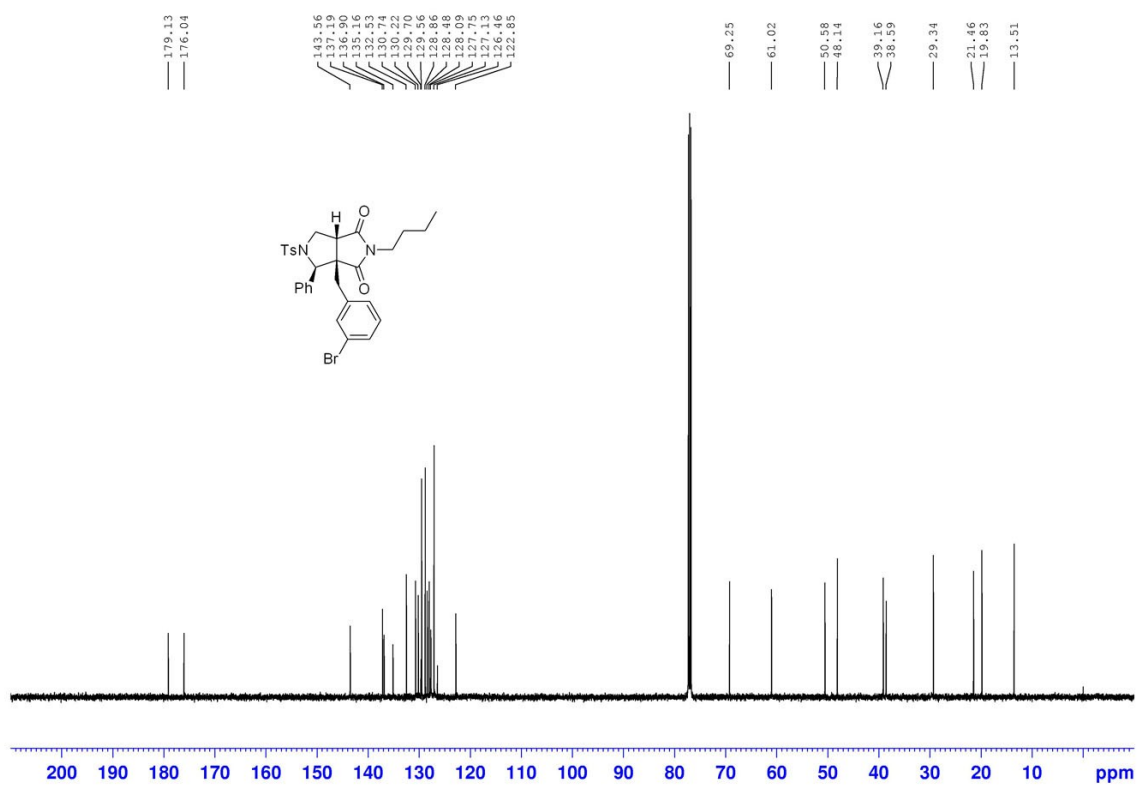



# Compound 5d

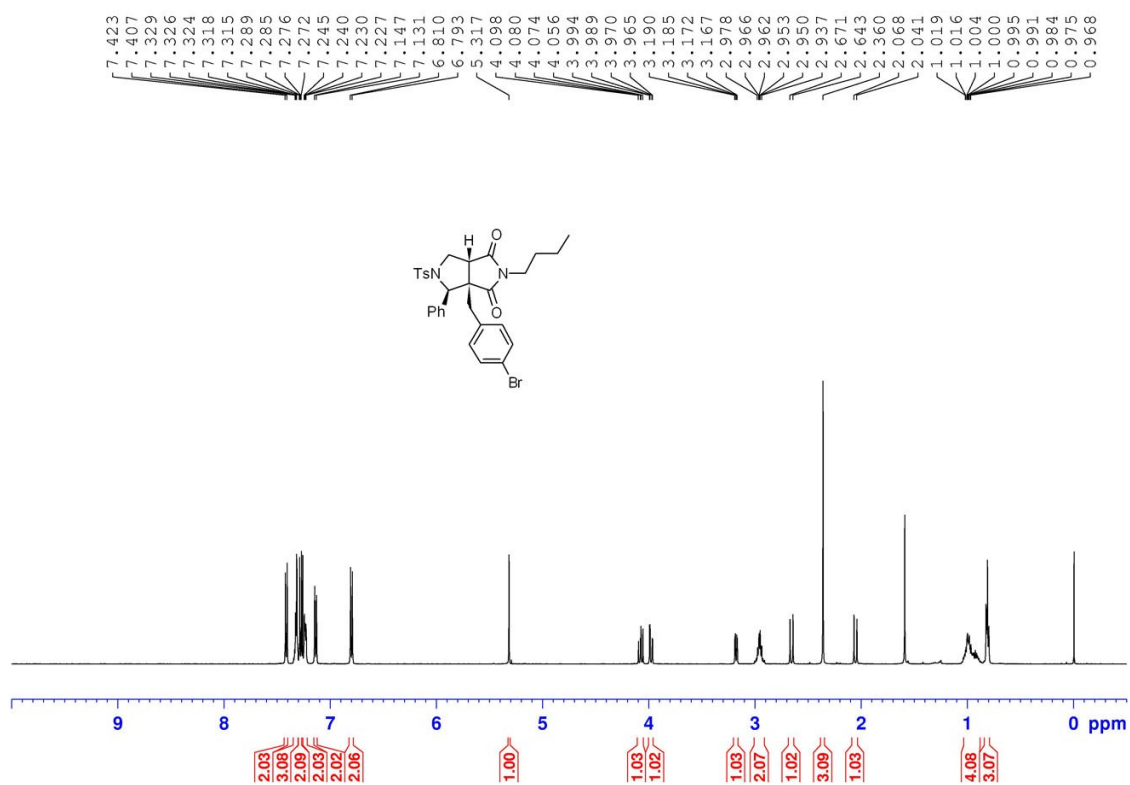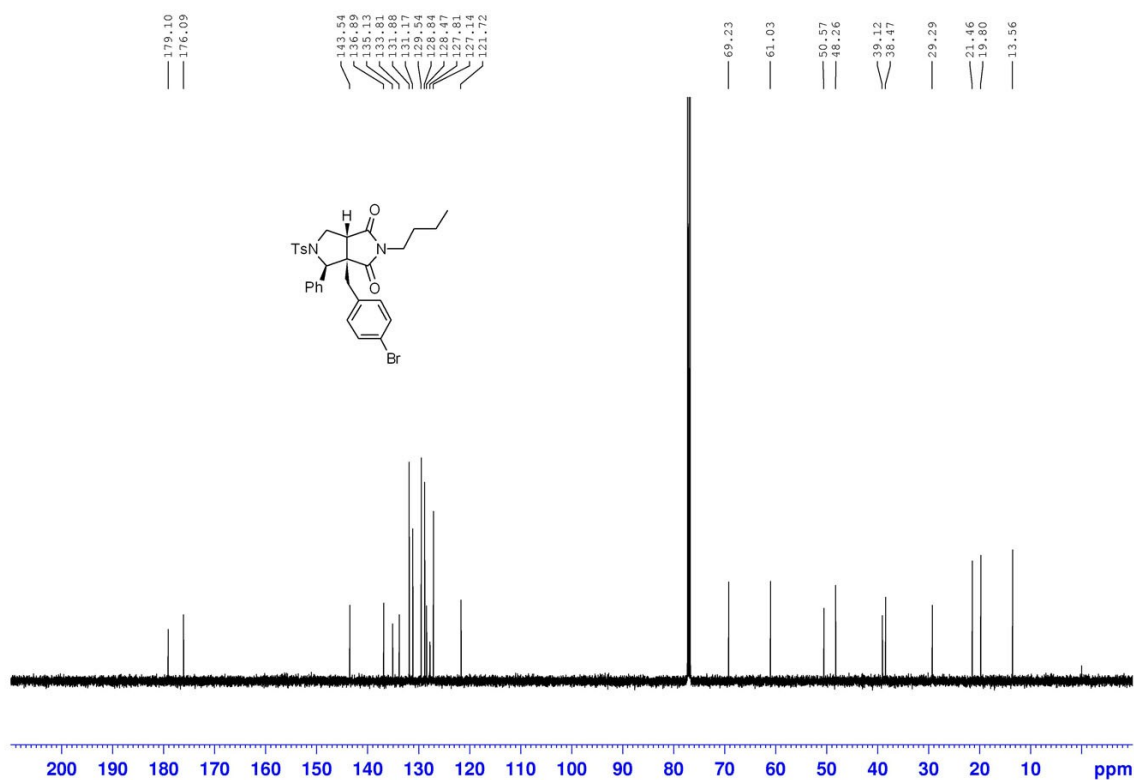

# Compound 5e

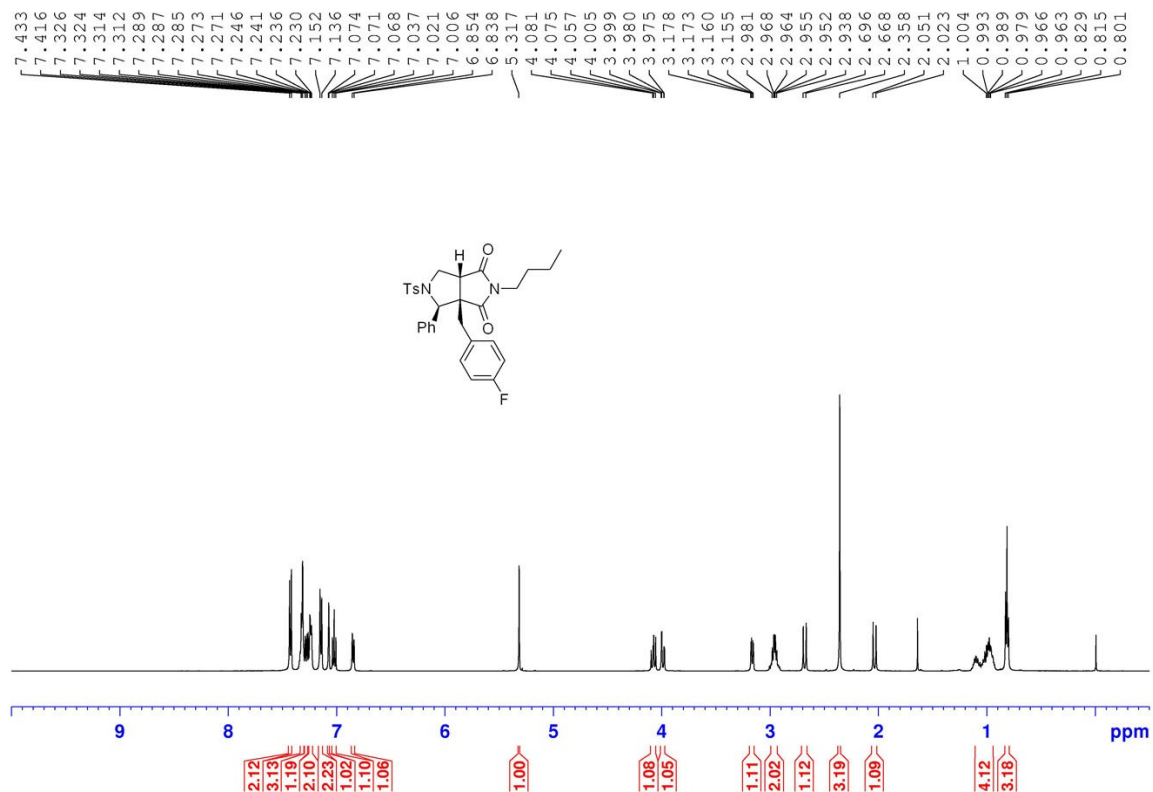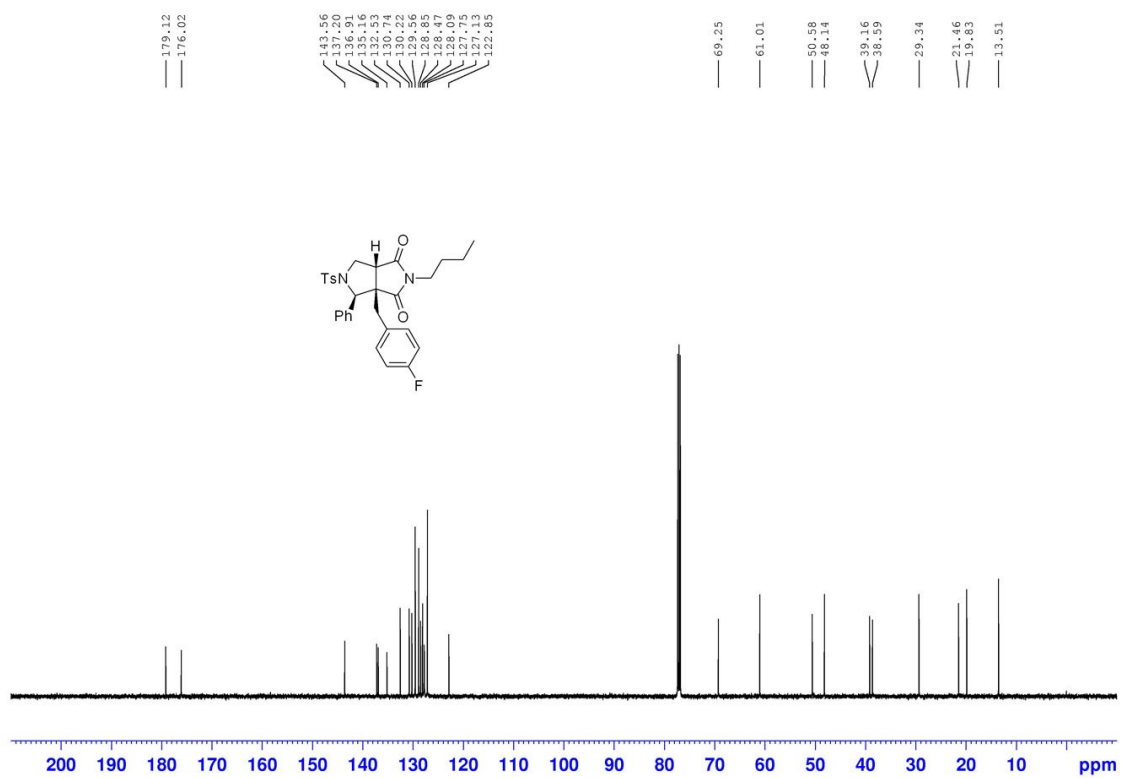

# Compound 5f

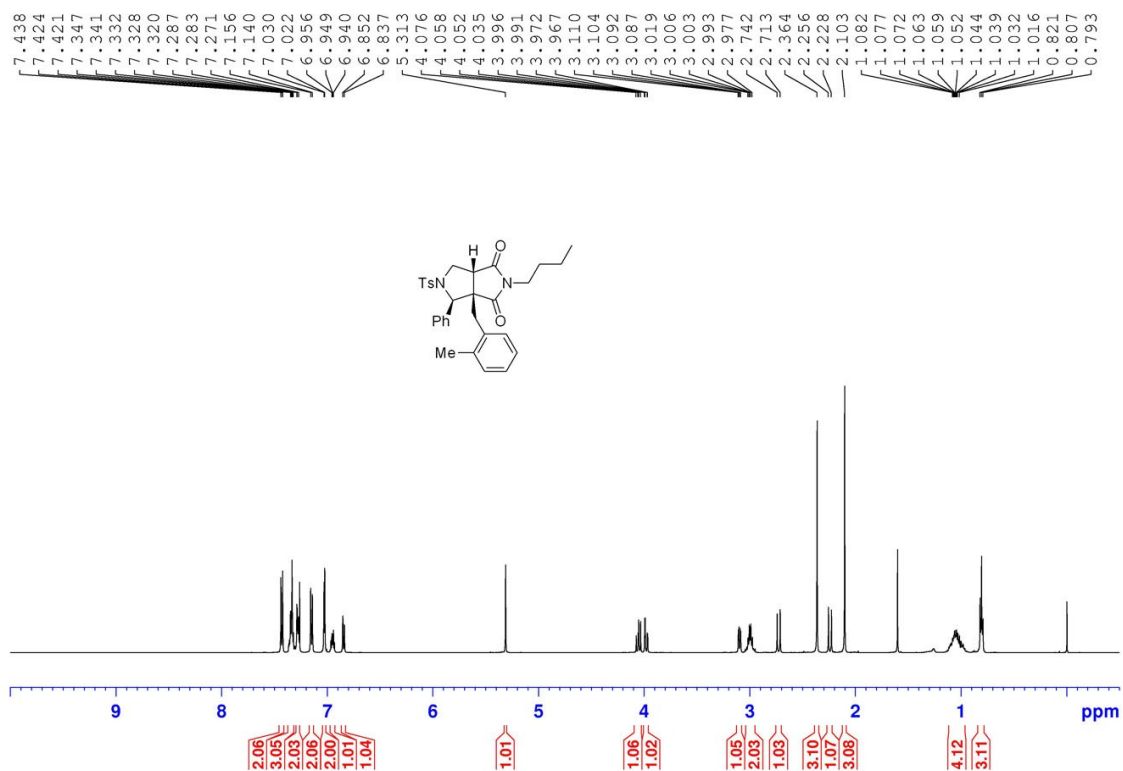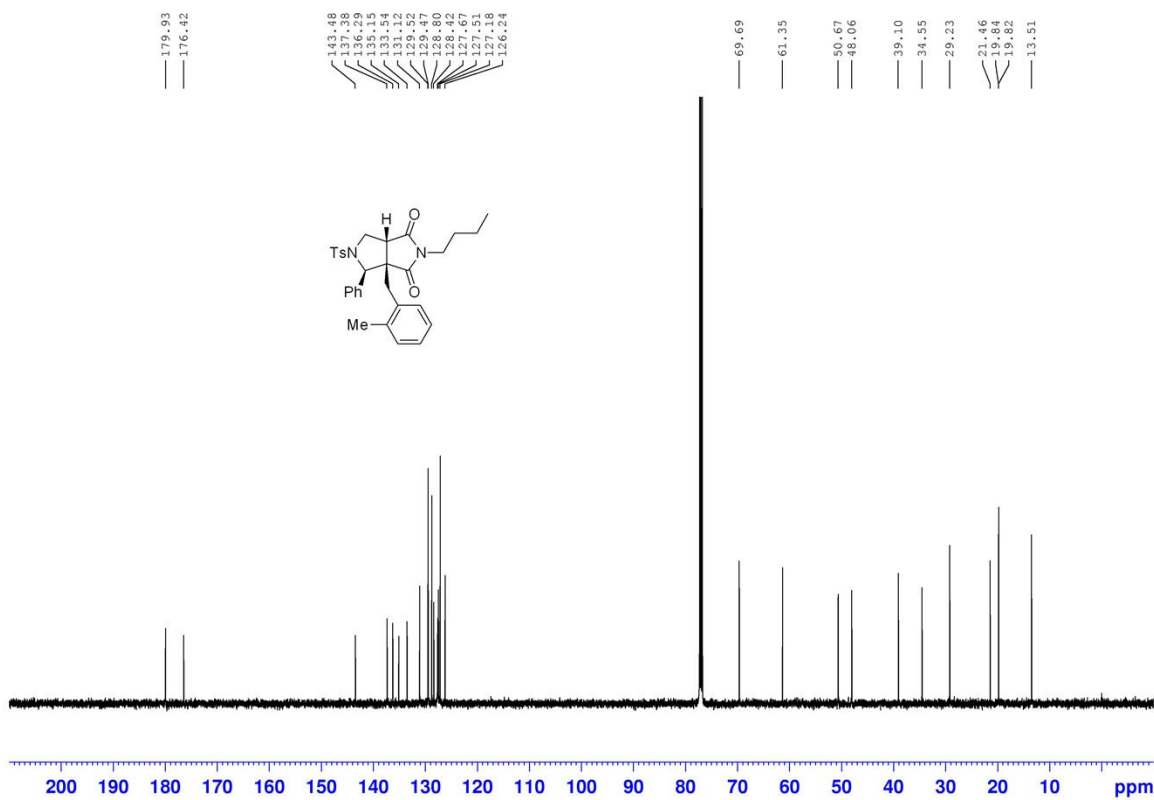

# Compound 5g

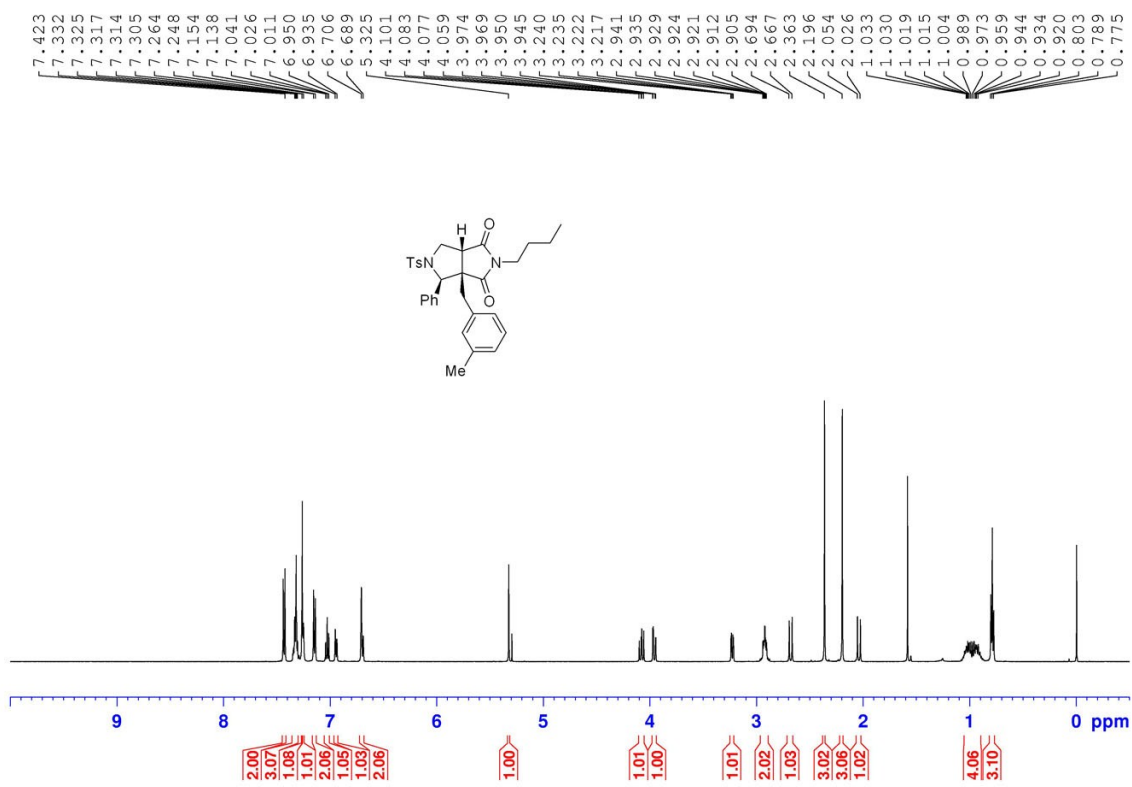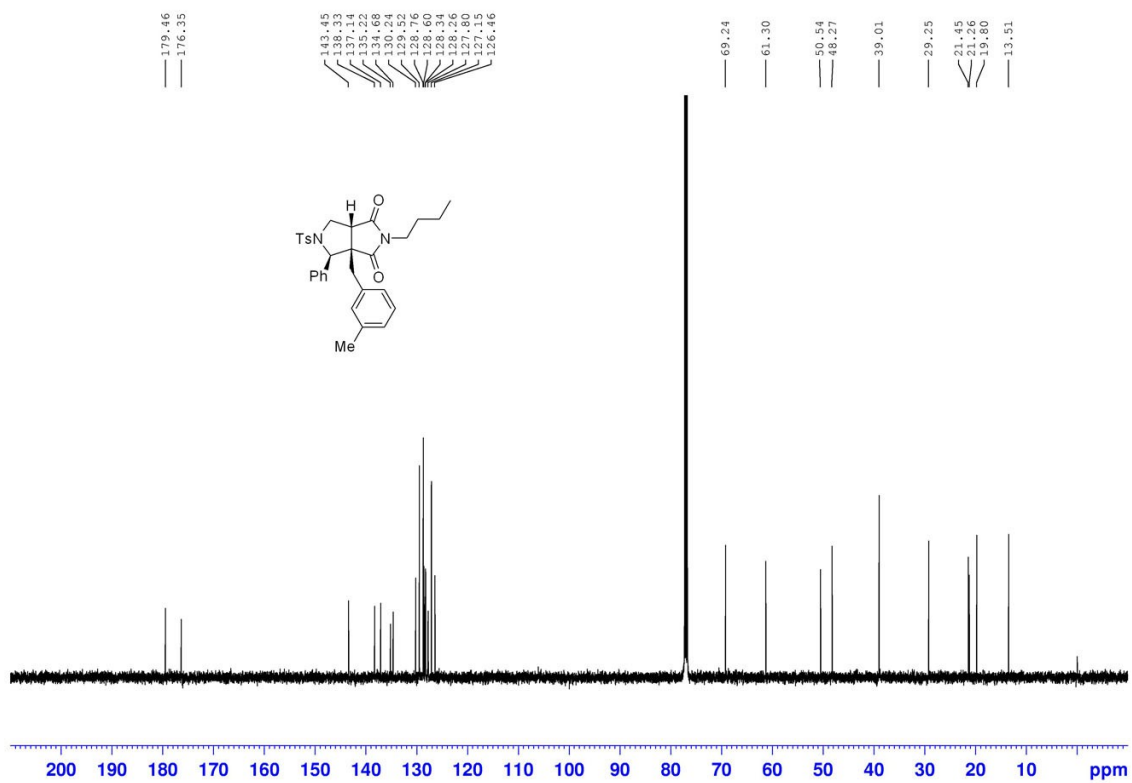

# Compound 5h

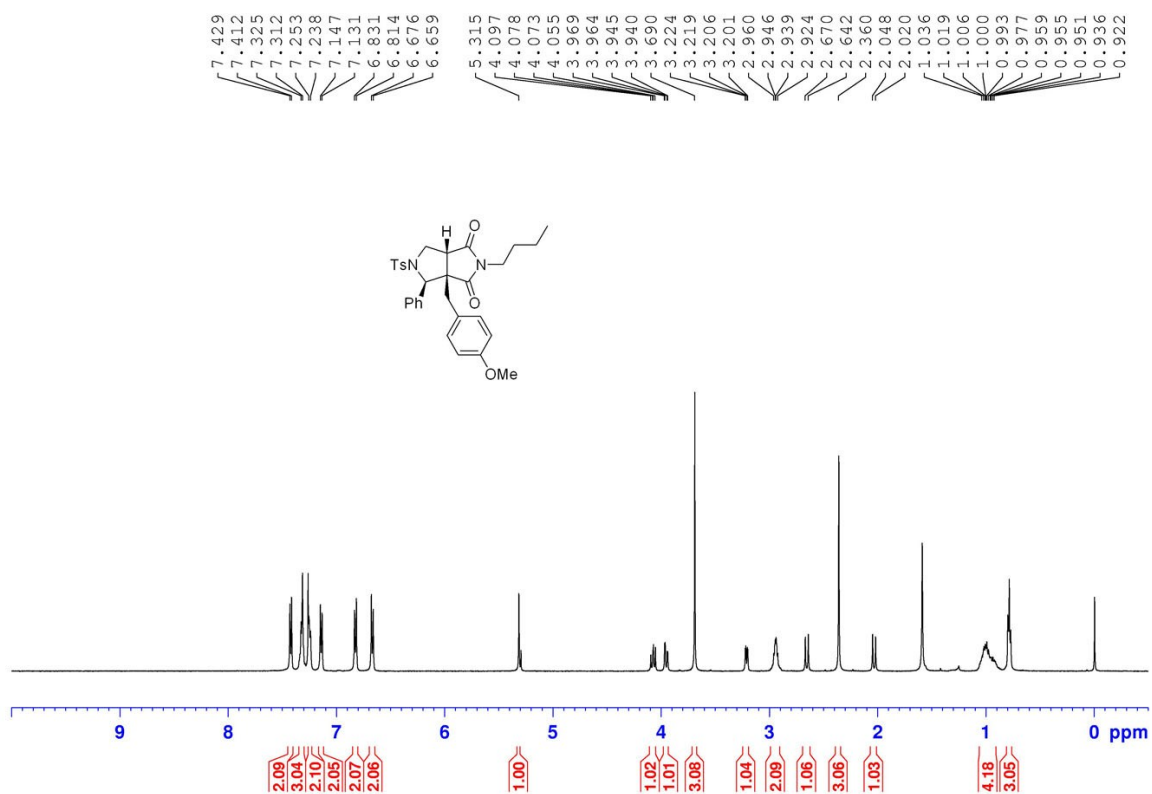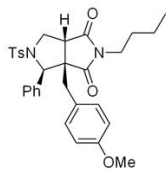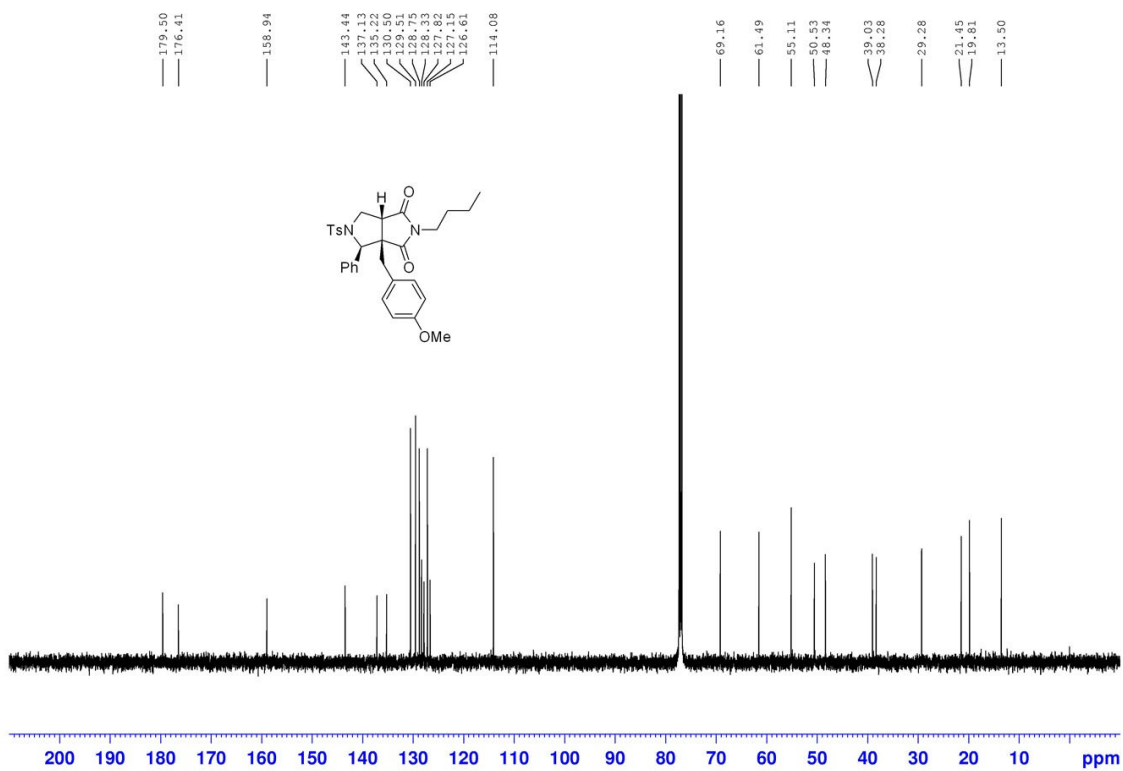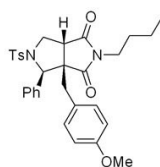



# Compound 6a

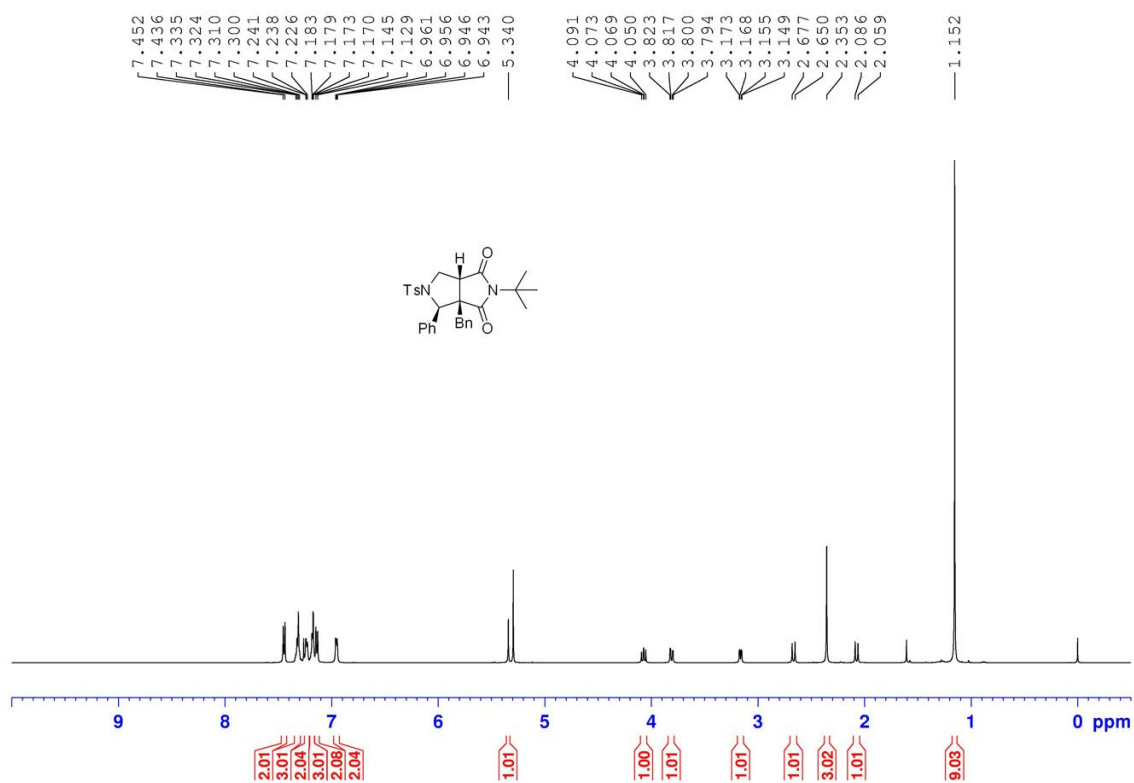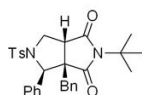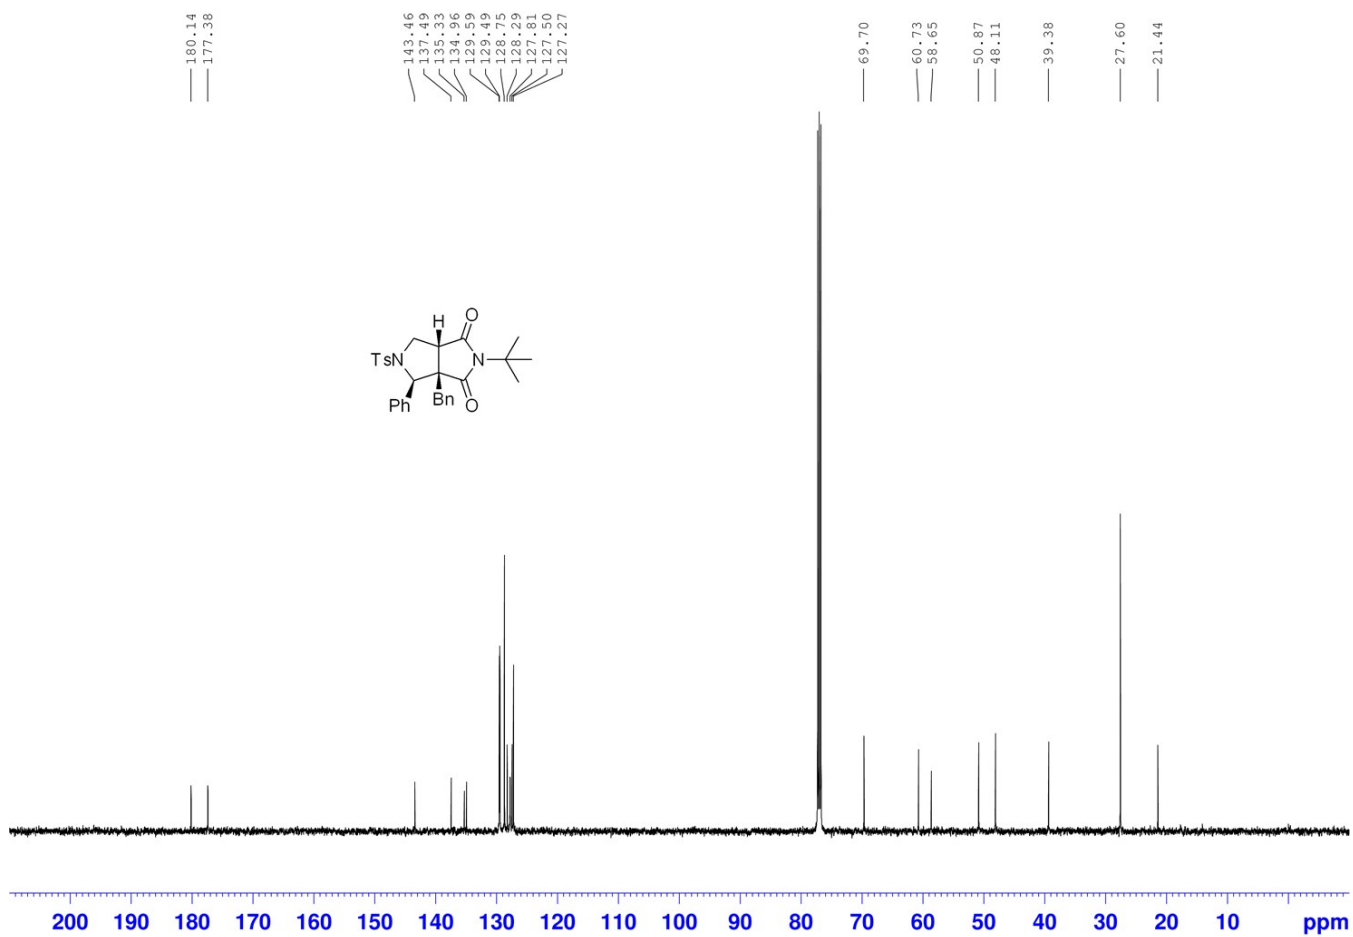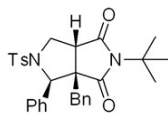

# Compound 6b

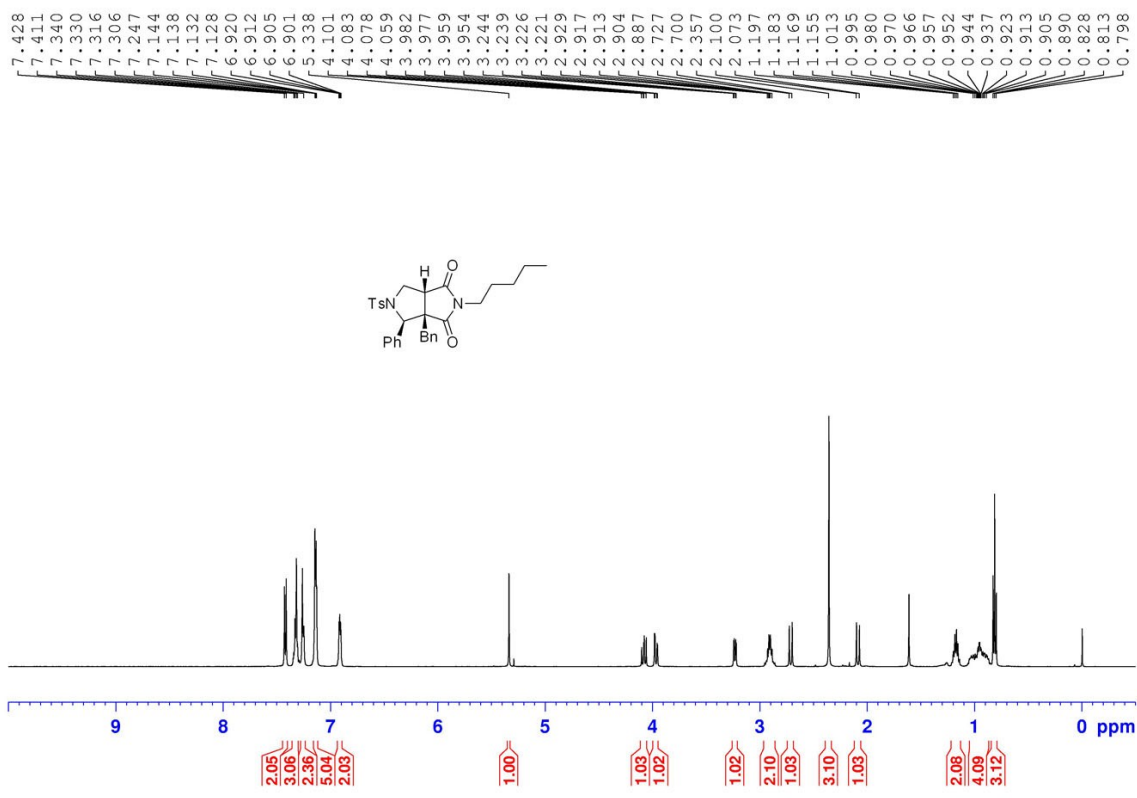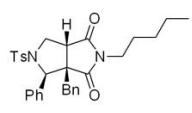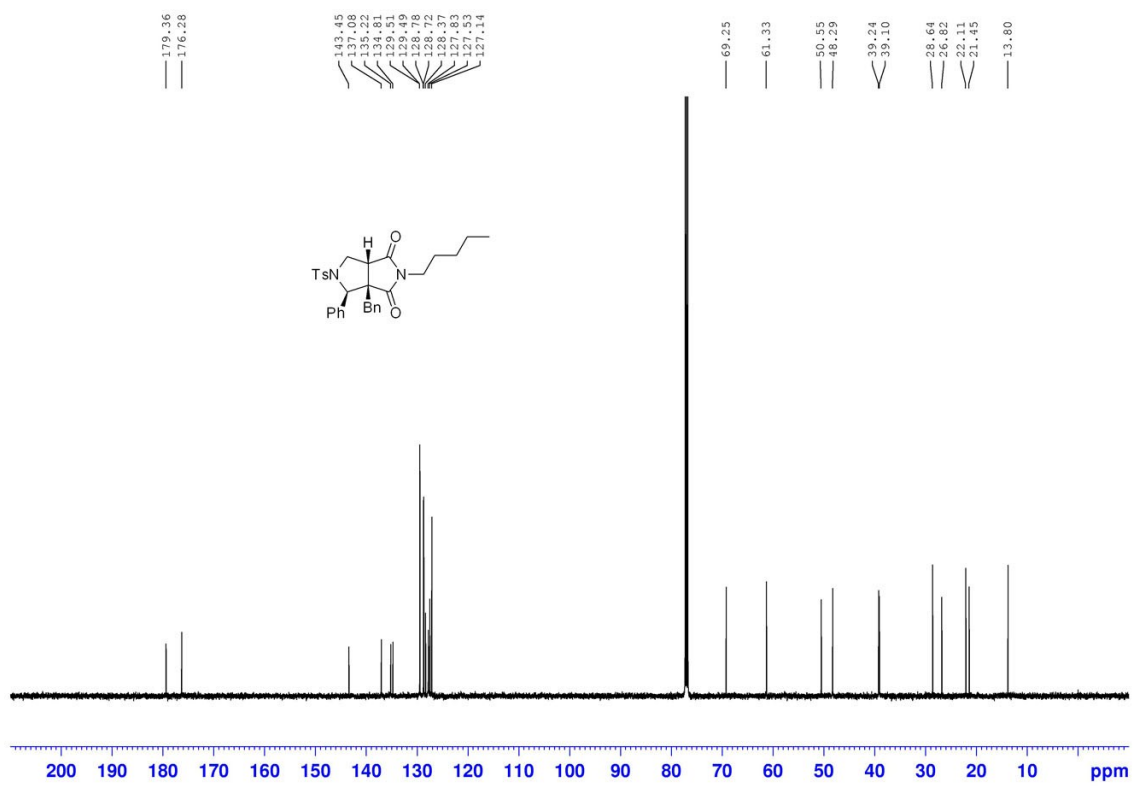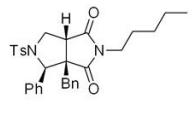



# Compound 6c

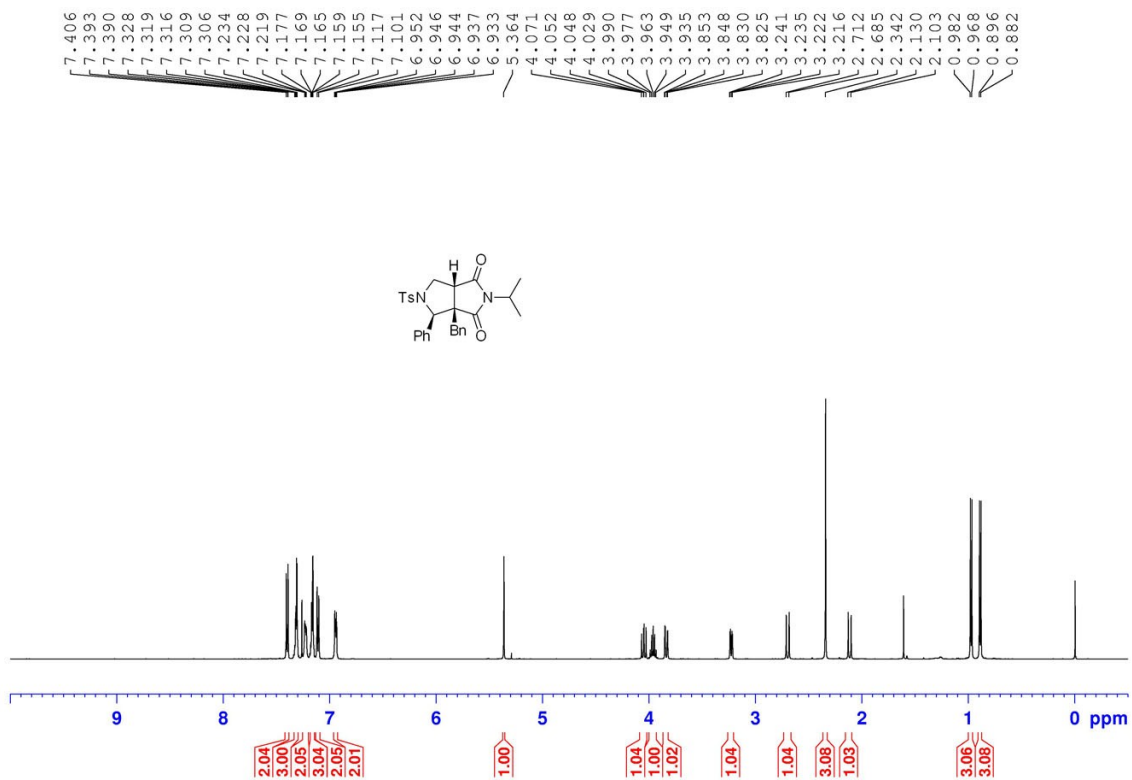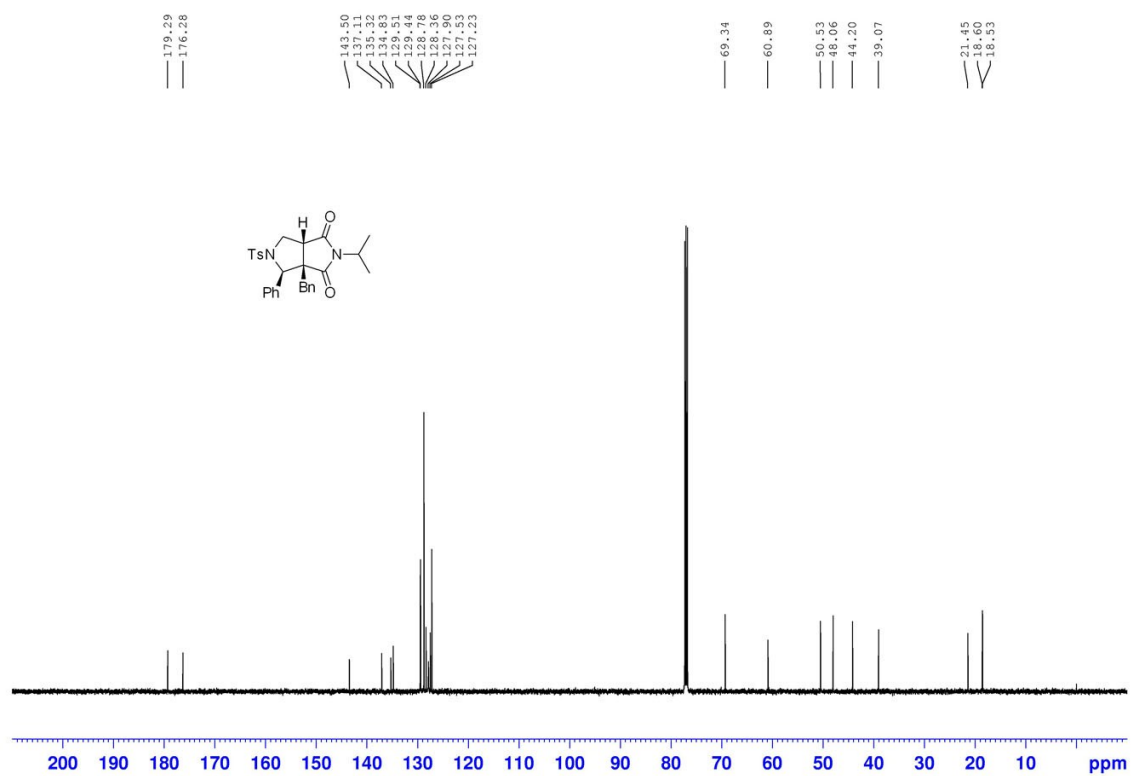

# Compound 6d

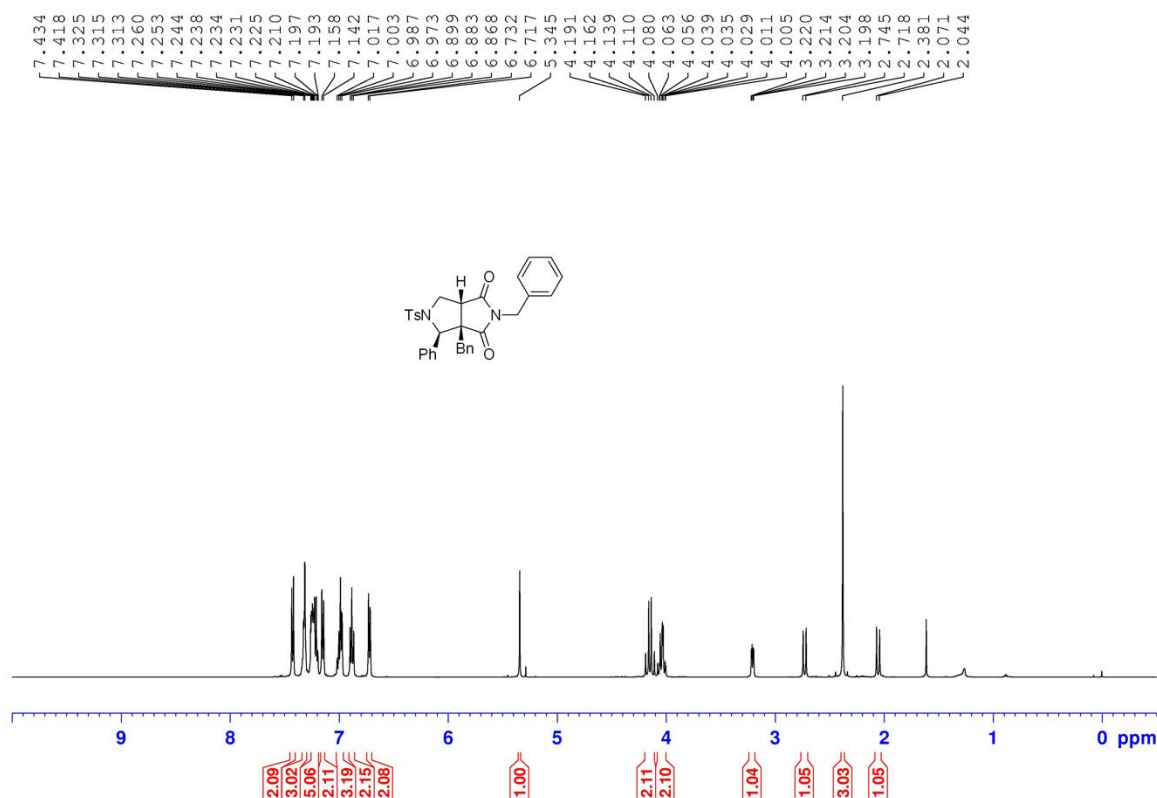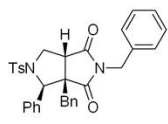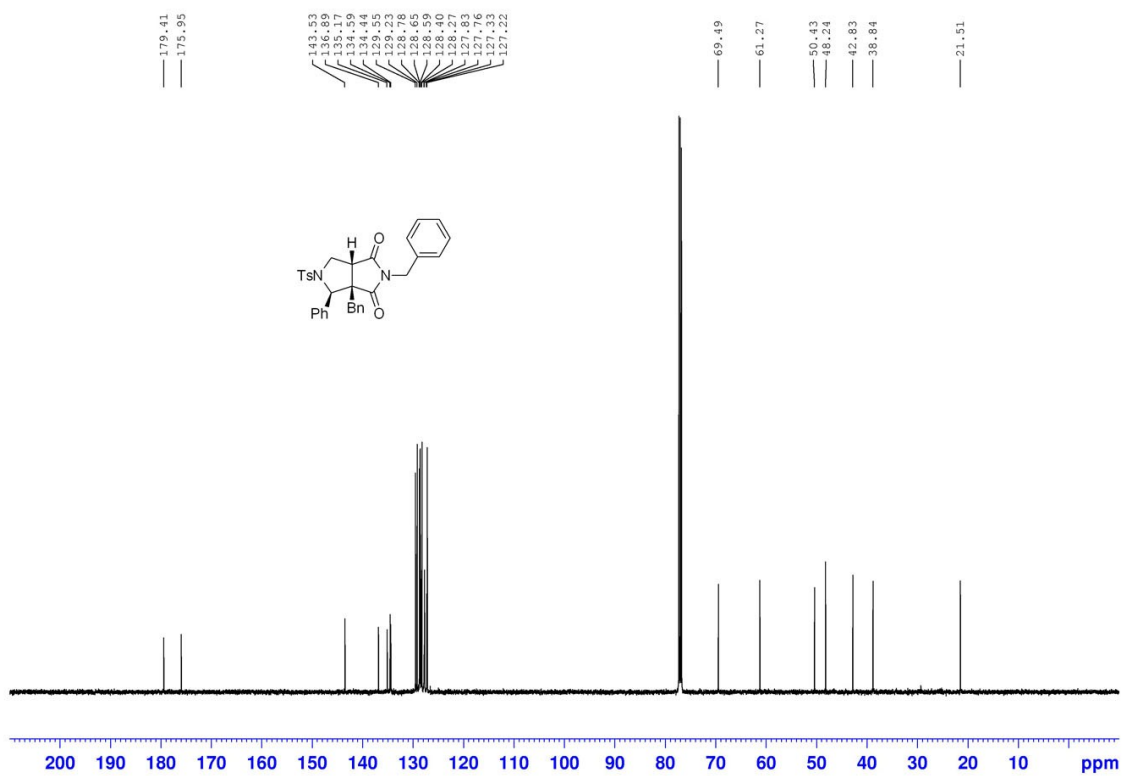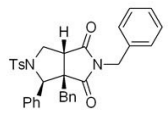

# Compound 6e

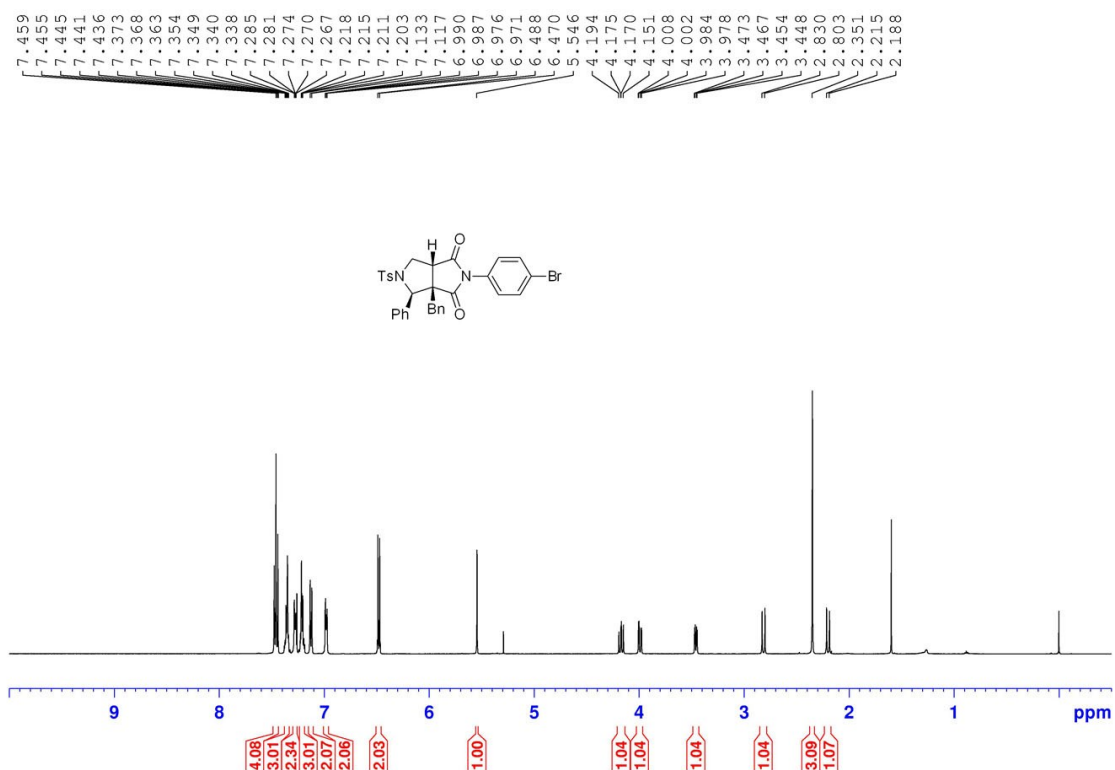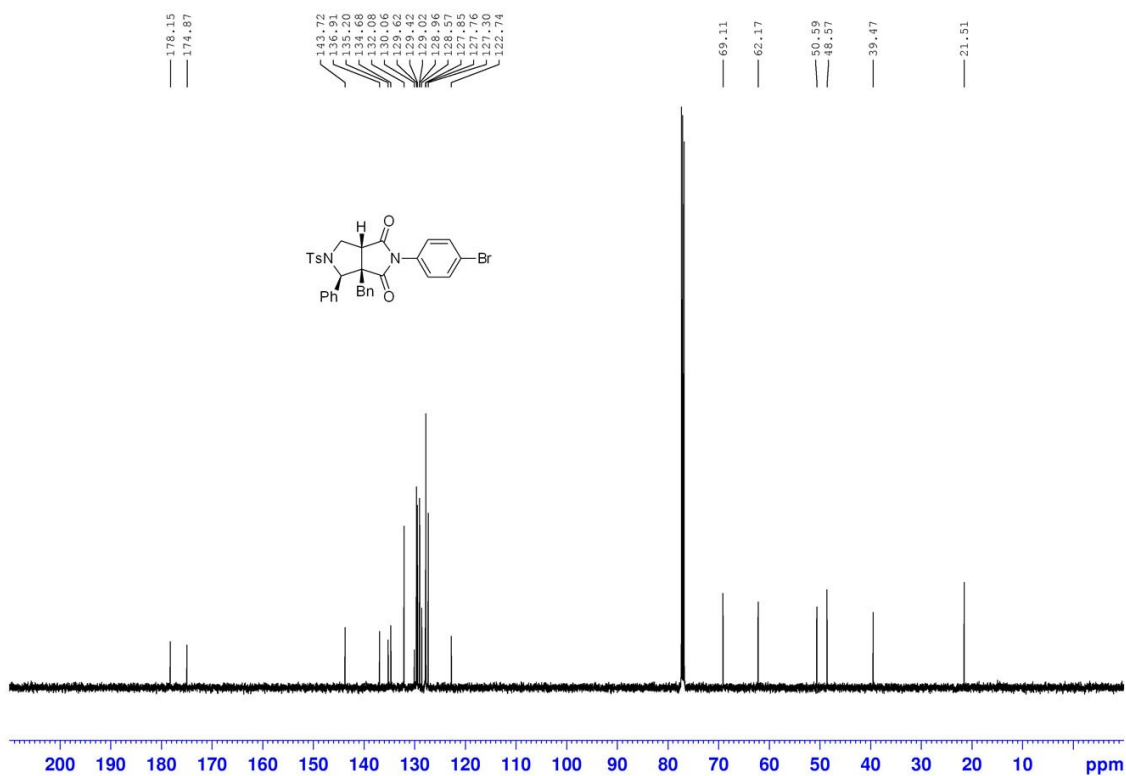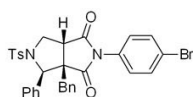

## 5 Crystal Structure of Compound 4a

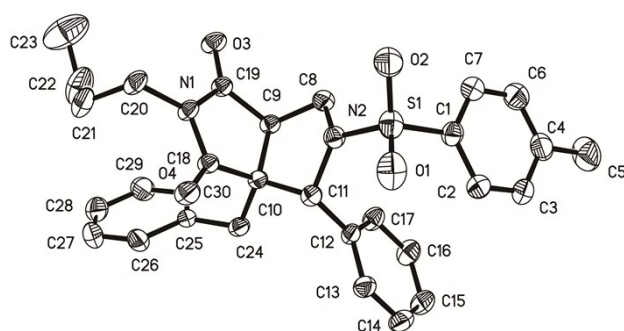

**Figure 1** Single Crystal X-Ray structure for **4a**

**Table 1** Crystal data and structure refinement for **4a**

|                                   |                                                                                                                 |
|-----------------------------------|-----------------------------------------------------------------------------------------------------------------|
| Empirical formula                 | C <sub>30</sub> H <sub>32</sub> N <sub>2</sub> O <sub>4</sub> S                                                 |
| Formula weight                    | 516.64                                                                                                          |
| Temperature                       | 296(2) K                                                                                                        |
| Wavelength                        | 0.71073 Å                                                                                                       |
| Crystal system, space group       | Monoclinic, P2(1)/c                                                                                             |
| Unit cell dimensions              | a = 8.337(9) Å    alpha = 90 °.<br>b = 26.49(3) Å    beta = 101.240(14) °.<br>c = 12.243(14) Å    gamma = 90 °. |
| Volume                            | 2652(5) Å <sup>3</sup>                                                                                          |
| Z, Calculated density             | 4, 1.294 Mg/m <sup>3</sup>                                                                                      |
| Absorption coefficient            | 0.161 mm <sup>-1</sup>                                                                                          |
| F(000)                            | 1096                                                                                                            |
| Crystal size                      | 0.200 x 0.100x 0.080 mm                                                                                         |
| Theta range for data collection   | 2.29 to 27.59°                                                                                                  |
| Limiting indices                  | -10 ≤ h ≤ 10, -34 ≤ k ≤ 28, -15 ≤ l ≤ 12                                                                        |
| Reflections collected / unique    | 15548 / 5995 [R(int) = 0.0388]                                                                                  |
| Completeness to theta = 25.05     | 97.7 %                                                                                                          |
| Absorption correction             | None                                                                                                            |
| Refinement method                 | Full-matrix least-squares on F <sup>2</sup>                                                                     |
| Data / restraints / parameters    | 5995 / 0 / 337                                                                                                  |
| Goodness-of-fit on F <sup>2</sup> | 1.037                                                                                                           |
| Final R indices [I > 2σ(I)]       | R1 = 0.0779, wR2 = 0.1980                                                                                       |
| R indices (all data)              | R1 = 0.1318, wR2 = 0.2284                                                                                       |
| Extinction coefficient            | 0.0068(13)                                                                                                      |
| Largest diff. peak and hole       | 0.596 and -0.470 e. Å <sup>-3</sup>                                                                             |
